# Supplementary material for: Unveiling the methionine cycle: a key metabolic signature and NR4A2 as a methionine-responsive oncogene in esophageal squamous cell carcinoma
Source: Springer Nature journal article supplement (doi:10.1038/s41418-024-01285-7), 2024-04-03
Supplement: MOESM1 [file 41418_2024_1285_MOESM1_ESM.pdf]

## Supplementary Information for

### 1 **Unveiling the Methionine Cycle: A Key Metabolic Signature and *NR4A2* as a** 2 **Methionine-Responsive Oncogene in Esophageal Squamous Cell Carcinoma**

3 Xing Jin<sup>1,2#</sup>, Lei Liu<sup>3#</sup>, Dan Liu<sup>1,2#</sup>, Jia Wu<sup>1,2</sup>, Congcong Wang<sup>1,2</sup>, Siliang Wang<sup>1,2</sup>, Fengying Wang<sup>1,2</sup>,  
4 Guanzhen Yu<sup>4,5</sup>, Xiaoxia Jin<sup>6</sup>, Yu-Wen Xue<sup>7</sup>, Dan Jiang<sup>7</sup>, Yan Ni<sup>8</sup>, Xi Yang<sup>9</sup>, Ming-Song Wang<sup>10</sup>,  
5 Zhi-Wei Wang<sup>11</sup>, Yuriy Orlov<sup>12-16</sup>, Wei Jia<sup>17</sup>, Gerry Melino<sup>18</sup>, Ji-Bin Liu<sup>19</sup>, Wen-Lian Chen<sup>1,2\*</sup>.

6 \*Corresponding author. Email: chenwl8412@shutcm.edu.cn (W.-L.C.)

7

8 **The supplementary file includes:**

9 **Supplementary Materials and Methods.**

10 **Figure S1. Related to Figure 1.** Activity and prognostic significance of the methionine cycle in  
11 clinical ESCC tissues of patients.

12 **Figure S2. Related to Figure 1.** Increased expression of methionine transporter and metabolic  
13 enzymes in clinical ESCC tissues.

14 **Figure S3. Related to Figure 2.** Exogenous SAH and Hcy uptake by ESCC cells, influence of  
15 methionine and its downstream metabolites on ESCC cell growth and cell cycle progression, and  
16 impact of dietary methionine on the body weight of mice.

17 **Figure S4. Related to Figure 3.** Comparison of METTL3 expression between ESCC tissues and  
18 NATs from validation cohort 3.

19 **Figure S5. Related to Figure 4.** Correlation analysis between the gene expression levels in the two  
20 different experimental settings, and the influence of methionine on mRNA m<sup>6</sup>A methylation of  
21 KYSE150 cells.

22 **Figure S6. Related to Figure 5.** SAM eliciting NR4A2 expression in ESCC cells via  
23 METTL3-mediated RNA m<sup>6</sup>A methylation, and construction of the fusion expression of wild-type or  
24 mutant 3'-UTR fragment of *NR4A2* with firefly luciferase reporter.

25 **Figure S7. Related to Figure 7.** Increased expression of NR4A2 in clinical ESCC tissues.

26 **Figure S8. Related to Figure 8.** Side effect analysis of oral celecoxib administration in mice  
27 harboring KYSE150 xenograft tumors.

28 **Table S1.** Basic characteristics of the discovery cohort, related to Figure 1.

29 **Table S2.** Basic characteristics of the validation cohort 1, related to Figure 1.

30 **Table S3.** Basic characteristics of the validation cohort 2, related to Figure 1.

31 **Table S4.** Basic characteristics of the validation cohort 3, related to Figure S2.

32 **Table S5.** The ingredients of high methionine (0.86%), medium methionine (0.35%), and low  
33 methionine (0.17%) diets for mouse, related to Figure 2.

34

35 **Other Supplementary Materials for this manuscript includes the following:**

36 Table S6. (Excel file) RNA transcripts with modified m<sup>6</sup>A peaks induced by methionine, related to  
37 Figure 4.

38 Uncropped WB images

39

40 **Supplementary Materials and Methods**41 **KEY RESOURCES TABLE**

| REAGENT or RESOURCE                               | SOURCE                                      | IDENTIFIER  |
|---------------------------------------------------|---------------------------------------------|-------------|
| Cell lines, Chemicals, Peptides, and antibodies   |                                             |             |
| Eca109                                            | SSRCC                                       | JY334       |
| KYSE150                                           | Stem Cell Bank, Chinese Academy of Sciences | TCHu236     |
| KYSE450                                           | Cobier Bioscience                           | CBP60458    |
| KYSE30                                            | Ek-Bioscience                               | CC-Y1314    |
| Het-1A                                            | ATCC                                        | CRL-2692    |
| HEK 293T                                          | ATCC                                        | CRL-3216    |
| 4-Nitroquinoline 1-oxide                          | Sigma                                       | N8141       |
| Methionine                                        | MCE                                         | HY-N0326    |
| S-Adenosyl-L-methionine                           | MCE                                         | HY-W017770  |
| S-Adenosyl-L-Homocysteine                         | Solarbio                                    | YZ-1012112  |
| L-Homocysteine                                    | MCE                                         | HY-W010347  |
| 1,2-Propanediol                                   | Sigma                                       | 57-55-6     |
| Methylene blue                                    | Solarbio                                    | G1300       |
| 3-Deazaadenosine                                  | MCE                                         | HY-W013332A |
| Actinomycin D                                     | MCE                                         | HY-17559    |
| STM2457                                           | MCE                                         | HY-134836   |
| Celecoxib                                         | MCE                                         | HY-14398    |
| Parecoxib                                         | MCE                                         | HY-17474A   |
| Rofecoxib                                         | MCE                                         | HY-17372    |
| Methylcellulose                                   | MCE                                         | HY-125861   |
| Cycloheximide                                     | MCE                                         | HY-12320    |
| Tween 80                                          | MCE                                         | HY-Y1891    |
| Cisplatin                                         | MCE                                         | HY-17394    |
| T-Store® Tissue Storage and Transportation Medium | Life science                                | TSTORE-P    |
| Trizol                                            | Thermo Fisher Scientific                    | 15596018    |
| Polybrene                                         | Beyotime                                    | C0351       |
| Puromycin                                         | Beyotime                                    | ST551       |
| Lipofectamine 3000                                | Thermo Fisher Scientific                    | L3000008    |
| Lipofectamine 2000                                | Thermo Fisher Scientific                    | 11668019    |
| BsmBI                                             | NEB                                         | R0739S      |
| RPMI 1640 medium                                  | Gibco                                       | 11875093    |
| RPMI 1640 medium (methionine-free)                | BasalMedia                                  | X102J1      |
| penicillin-streptomycin                           | Gibco                                       | 15140122    |

| REAGENT or RESOURCE                            | SOURCE                    | IDENTIFIER  |
|------------------------------------------------|---------------------------|-------------|
| Fetal Bovine Serum                             | Biological Industries     | 04-001-1ACS |
| Hind III                                       | Takara                    | 1060        |
| XbaI                                           | Takara                    | 1093        |
| PrimeSTAR® Max DNA Polymerase                  | Takara                    | R045        |
| 5×Loading buffer                               | Bio-rad                   | 1610747     |
| Anti-SLC7A5 antibody                           | proteintech               | 28670-1-AP  |
| Anti-MAT2A antibody                            | proteintech               | 55309-1-AP  |
| Anti-MAT2B antibody                            | proteintech               | 15952-1-AP  |
| Anti-AHCY antibody                             | proteintech               | 10757-2-AP  |
| Anti-Keratin 14                                | proteintech               | 10143-1-AP  |
| Anti-Ki-67                                     | proteintech               | 27309-1-AP  |
| Anti-m <sup>6</sup> A antibody                 | proteintech               | 68055-1-Ig  |
| Anti-NR4A2 antibody                            | proteintech               | 10975-2-AP  |
| Anti-METTL3 antibody                           | Cell Signaling Technology | 86132       |
| Anti-IGF2BP1 antibody                          | proteintech               | 22803-1-AP  |
| Anti-IGF2BP2 antibody                          | proteintech               | 11601-1-AP  |
| Anti-IGF2BP3 antibody                          | proteintech               | 14642-1-AP  |
| Anti- rabbit-IgG                               | Cell Signaling Technology | 2729        |
| Anti-Cyclin B1                                 | proteintech               | 55004-1-AP  |
| Anti-PCNA antibody                             | Cell Signaling Technology | 13110       |
| Anti-β-Actin antibody                          | proteintech               | 20536-1-AP  |
| Anti-mouse-IgG-HRP antibody                    | Cell Signaling Technology | 7076        |
| Anti-rabbit-IgG-HRP antibody                   | Cell Signaling Technology | 7074        |
| Oligonucleotides (5'→3')                       |                           |             |
| CRISPR guide RNA for non-target control (NC):  |                           |             |
| FWD: AAGAAGAATTGGGGATGATG                      | Addgene                   | N/A         |
| REV: CATCATCCCCAATTCTTCTT                      |                           |             |
| CRISPR guide RNA #1 for human <i>METTL3</i> :  |                           |             |
| FWD: CAGACCAGAGACTAACGAAC                      | Addgene                   | N/A         |
| REV: GTTCGTTAGTCTCTGGTCTG                      |                           |             |
| CRISPR guide RNA #2 for human <i>METTL3</i> :  |                           |             |
| FWD: CTTAGATCTACGGAATCCAG                      | Addgene                   | N/A         |
| REV: CTGGATTCCGTAGATCTAAG                      |                           |             |
| CRISPR guide RNA #1 for human <i>NR4A2</i> :   |                           |             |
| FWD: ATTACCTGTATGCTAATCGA                      | Addgene                   | N/A         |
| REV: TCGATTAGCATAACAGGTAAT                     |                           |             |
| CRISPR guide RNA #2 for human <i>NR4A2</i> :   |                           |             |
| FWD: TTGTCCTTCGATTAGCATAAC                     | Addgene                   | N/A         |
| REV: GTATGCTAATCGAAGGACAA                      |                           |             |
| CRISPR guide RNA #1 for Human <i>IGF2BP2</i> : | Addgene                   | N/A         |

| REAGENT or RESOURCE                                                                                                                                                                  | SOURCE  | IDENTIFIER |
|--------------------------------------------------------------------------------------------------------------------------------------------------------------------------------------|---------|------------|
| FWD: ACTGGCTTACCTCCCACTGC<br>REV: GCAGTGGGAGGTAAGCCAGT                                                                                                                               |         |            |
| CRISPR guide RNA #2 for Human <i>IGF2BP2</i> :<br>FWD: ACATCCCTCCTCACCTGCAG<br>REV: CTGCAGGTGAGGAGGGATGT                                                                             | Addgene | N/A        |
| Primers for full-length coding sequence of human <i>NR4A2</i> :<br>FWD:<br>CCCAAGCTTATGGACTACAAGGACGACGATGACAAGCCTTGTGTTCAGGC<br>GCAGTATGG<br>REV: TGCTCTAGATTAGAAAGGTAAAGTGCCAGGAAA | BioSune | N/A        |
| Primers for <i>NR4A2</i> -Mut1:<br>FWD: CTGCTTTTTGAATCAGCTTTCTTAGATCTGTTGTCCCTCGATTA<br>REV: TAATCGAAGGACAAACAGATCTAAGAAAGCTGATTCAAAAAGCAG                                           | BioSune | N/A        |
| Primers for <i>NR4A2</i> -Mut2:<br>FWD: CACCGCCAGCAATAATTGACAACTTTTCCTGGTCACTTTACCTT<br>REV: AAGGTAAAGTGACCAGGAAAAGTTTGTCAATTATTGCTGGCGGTG                                           | BioSune | N/A        |
| Primers for <i>NR4A2</i> -3'-UTR-WT:<br>FWD: TGCTCTAGAGACCTCCTCCCAAGCACTTCAAAGG<br>REV: TGCTCTAGAGTGCCTATAACATTTTCAACCTAGA                                                           | BioSune | N/A        |
| Primers for <i>NR4A2</i> -Mut3:<br>FWD: CCCAAGCACTTCAAAGGATCTGGAATG<br>REV: CATTCCAGATCCTTTGAAGTGCTTGGG                                                                              | BioSune | N/A        |
| Primers for qRT-PCR of <i>NR4A2</i> :<br>FWD: GTTCAGGCGCAGTATGGGTC<br>REV: CTCCCGAAGAGTGGTAACTGT                                                                                     | BioSune | N/A        |
| Primers for qRT-PCR of <i>ACTB</i> :<br>FWD: CATGTACGTTGCTATCCAGGC<br>REV: CTCCTTAATGTCACGCACGAT                                                                                     | BioSune | N/A        |

#### Critical Commercial Assays

|                                                                  |                   |           |
|------------------------------------------------------------------|-------------------|-----------|
| BCA Assay Kit                                                    | Thermo Scientific | 23225     |
| PrimeScript RT reagent Kit                                       | Takara            | RR047     |
| FITC Annexin V Apoptosis Detection Kit                           | BD                | 556547    |
| Cell Cycle Analysis Kit                                          | Beyotime          | C1052     |
| Cell Counting Kit-8(CCK-8)                                       | ShareBio          | SB-CCK8   |
| Ultrapure RNA Kit                                                | CWBIO             | CW0581    |
| SYBR Premix Ex Taq Kit                                           | Takara            | RR390     |
| NEBNext Poly(A) mRNA Magnetic Isolation Module                   | NEB               | E7490     |
| NEBNext rRNA Depletion Kit                                       | NEB               | E6310     |
| Methylated RNA immune-precipitation (MeRIP) m <sup>6</sup> A kit | GenSeq®           | GS-ET-001 |
| QuickMutation™Plus Site-Directed Mutagenesis Kit                 | Beyotime          | D0208S    |

| REAGENT or RESOURCE                     | SOURCE                                     | IDENTIFIER                                                          |
|-----------------------------------------|--------------------------------------------|---------------------------------------------------------------------|
| Promega Dual-Luciferase reporter system | Promega                                    | E1910                                                               |
| RNA Immunoprecipitation (RIP) kit       | GenSeq®                                    | GS-ET-006                                                           |
| Experimental Models: Organisms/Strains  |                                            |                                                                     |
| Mouse: BALB/c-nude                      | Shanghai SLAC Laboratory<br>Animal Co.,Ltd | N/A                                                                 |
| Mouse: C57BL/6                          | Shanghai SLAC Laboratory<br>Animal Co.,Ltd | N/A                                                                 |
| Recombinant DNA                         |                                            |                                                                     |
| Lenti-CRISPR-V2                         | Addgene                                    | 52961                                                               |
| psPAX2 packaging vector                 | Addgene                                    | 12260                                                               |
| pMD2.G packaging vector                 | Addgene                                    | 12259                                                               |
| pGL3-Promoter Vector                    | Promega                                    | E1761                                                               |
| Software and Algorithms                 |                                            |                                                                     |
| R language                              | Open source                                | <a href="https://www.r-project.org/">https://www.r-project.org/</a> |
| ImageJ software                         | Open source                                | <a href="https://imagej.nih.gov/ij/">https://imagej.nih.gov/ij/</a> |
| CRISPR Guide RNA database               | Open source                                | <a href="http://www.addgene.org/">www.addgene.org/</a>              |
| Autodock                                | Open source                                | <a href="http://autodock.scripps.edu/">autodock.scripps.edu/</a>    |

42

## 43 RESOURCE AVAILABILITY

### 44 Lead contact

45 Further information and requests for resources should be directed to and will be fulfilled by the lead  
46 contact, Wen-Lian Chen ([chenwl8412@shutcm.edu.cn](mailto:chenwl8412@shutcm.edu.cn)).

### 47 Materials availability

48 Materials and reagents used in this study are listed in the key resources table. Plasmids generated in  
49 this study are available from the lead contact upon request.

50

### 51 Data and code availability

52 ● This paper reanalyzes the metabolomic and proteomic data of an ESCC discovery cohort which  
53 we reported previously [1]. The raw data are available at <https://www.biosino.org/node> with

54 accession numbers OEP002347 for metabolomic dataset and OEP002405 for proteomic dataset.

55 ● RNA-seq and MeRIP-seq data generated by this study are deposited to the National Omics Data  
56 Encyclopedia (NODE) database (<https://www.biosino.org/node>) at Bio-Med Big Data Center  
57 affiliated with Shanghai Institute of Nutrition and Health, Chinese Academy of Sciences, with an  
58 accession number of OEP004978.

59 ● This paper does not report original code.

60 ● Any additional information required to reanalyze the data reported in this paper is available from  
61 the lead contact upon request.

62

## 63 **EXPERIMENTAL MODEL AND SUBJECT DETAILS**

### 64 **Patient cohorts**

65 We enrolled four ESCC cohorts into this study, including a discovery cohort, which we reported  
66 previously [1], and three validation cohorts, from the Affiliated Tumor Hospital of Nantong  
67 University (ATHNU) (Nantong, China) at different time periods: from 2013 to 2015 for validation  
68 cohort 1 (n = 94), from 2019 to 2020 for validation cohort 2 (n = 112), and from 2019 to 2022 for  
69 validation cohort 3 (n = 41). All patients were newly diagnosed and received no prior treatment for  
70 their disease. Notably, all participants provided informed written consent in accordance with the  
71 regulation of the Institutional Review Board of the ATHNU (Approval number 2019-022) in  
72 agreement with the Declaration of Helsinki.

73 The following pretreatment examinations were conducted for each patient: neck, thorax, and  
74 abdomen plain and contrast-enhanced computed tomography; and esophagogastroduodenoscopy,  
75 with ultrasound endoscopy. Optional examinations included bronchoscopy, which was used to

76 exclude tumor infiltration into the trachea or bronchial tree, positron emission tomography, and  
77 radionuclide bone imaging.

78 Disease staging was carried out according to the American Joint Committee on Cancer 8<sup>th</sup> edition  
79 staging system and the Comprehensive Cancer Network (NCCN) Guidelines for Esophageal and  
80 Esophagogastric Junction Cancers [2-4], while treatment protocol for each patient was established by  
81 referring to the NCCN Guidelines for Esophageal and Esophagogastric Junction Cancers [3-5].

82

### 83 **Cellular models**

84 Human ESCC cell lines (KYSE150, Eca109, KYSE450, and KYSE30), non-transformed esophageal  
85 epithelial cell line Het-1A, and HEK 293T were enrolled into this study. All cell lines were  
86 authenticated using short tandem repeat (STR) profiling. Of note, all cell lines (and their derivatives)  
87 were maintained in RPMI 1640 with 10% fetal bovine serum (FBS), 100 U/mL penicillin, and 100  
88 mg/mL streptomycin at 37 °C in 5% CO<sub>2</sub>.

89

### 90 ***Ex vivo* culture model using primary tissues from patients**

91 In the ATHNU, when the patients with ESCC underwent esophagectomy, their fresh and primary  
92 tissues were quickly harvested and stored in the T-Store® Tissue Storage and Transportation Medium  
93 at room temperature (RT). These fresh tissues were immediately sent to the Cancer Institute,  
94 Longhua Hospital (CILH, Shanghai, China) at RT for *ex vivo* culture. The *ex vivo* culture model was  
95 established as we previously described [6]. In brief, fresh tissues from patients were washed twice in  
96 phosphate buffered saline (PBS) solution, cut, and weighed. Subsequently, the acquired tissue  
97 segments were cultured in RPMI 1640 medium with or without methionine, as indicated in the

98 corresponding figures or figure legends.

99

## 100 **Mouse models**

101 A subcutaneous xenograft ESCC model and an orthotopic ESCC model induced by a chemical  
102 carcinogen 4-nitroquinoline 1-oxide (4-NQO) were recruited in this study. The subcutaneous  
103 xenograft tumor model was established using female BALB/c-nude mice, while the orthotopic tumor  
104 model was constructed using female C57BL/6 mice. All mice were housed in well-ventilated cages  
105 at a constant temperature and humidity ( $23\text{ }^{\circ}\text{C} \pm 2\text{ }^{\circ}\text{C}$ , 50–60%) in a specific pathogen-free (SPF)  
106 controlled environment, with a standard 12-12 h light-dark cycle, and food and water were provided  
107 *ad libitum*. The weight and signs of diseases were measured in regular intervals. Subcutaneous tumor  
108 xenograft experiments were approved by the Institutional Animal Care and Use Committee of  
109 Shanghai University of Traditional Chinese Medicine (Approval number SYXK-Hu-2020-0009).  
110 Studies of carcinogen-induced ESCC mice were approved and conducted by Wuhan Servicebio  
111 Technology Co., Ltd (Approval number 2018015). There were at least 5 mice in each group ( $n = 5$ ).

112

## 113 **METHOD DETAILS**

### 114 **Acquisition of clinical specimens and clinical data**

115 In the ATHNU, ESCC tumor tissues and paired normal adjacent tissues (NATs) were harvested from  
116 patients of four cohorts when they underwent esophagectomy. Tissue samples were either flash  
117 frozen in liquid nitrogen and then transferred to  $-80\text{ }^{\circ}\text{C}$  freezer for long-term storage, or  
118 formalin-fixed paraffin-embedded for hematoxylin and eosin (H&E) staining and tissue microarray  
119 preparation. The H&E slides of each patient were independently reviewed by three board-certificated

120 pathologists to assess the pathological characteristics. Acceptable ESCC tissue segments were  
121 determined by the percent viable tumor nuclei (> 80%), total cellularity (> 50%) and necrosis (<  
122 20%).

123 Clinical characteristics of each patient were carefully reviewed and recorded. Overall survival (OS)  
124 and disease-free survival (DFS) were obtained for validation cohort 1 and validation cohort 2. OS  
125 was computed using the time from the date of surgery to the date of death or the last follow-up. DFS  
126 was calculated using the time from the date of resection to the date of disease recurrence or death.

127

### 128 **Cell culture**

129 Cells were cultured in standard RPMI 1640 or methionine-free RPMI 1640 as indicated in the figures  
130 or figure legends, with 10% fetal bovine serum (FBS) or 10% dialyzed FBS (dFBS), 100 U/mL  
131 penicillin, and 100 mg/mL streptomycin at 37 °C in 5% CO<sub>2</sub>. Methionine, SAM, SAH, or Hcy was  
132 supplemented into the methionine-free RPMI 1640 as demonstrated in the figures or figure legends.

133

### 134 ***Ex vivo* culture of primary tissues derived from patients**

135 *Ex vivo* culture of fresh and primary tissues from patients was performed following the protocol  
136 which we depicted previously [6]. When the fresh tissues were received, they were washed twice in  
137 PBS solution, cut, and weighed. The obtained tissue segments were cultured in methionine-free  
138 RPMI 1640 medium with 10% FBS, 100 U/mL penicillin, and 100 mg/mL streptomycin at 37 °C in  
139 5% CO<sub>2</sub> for 24 hours. Methionine, SAM, SAH, or Hcy was supplemented as indicated in the  
140 corresponding figures or figure legends.

141

142 **Subcutaneous xenograft tumor mouse model**

143 For the establishment of subcutaneous xenograft model, KYSE150, Eca109, or their derivatives were  
144 resuspended in PBS buffer at a density of  $5 \times 10^7$  cells/mL. Subsequently, 100  $\mu$ L cell suspension  
145 solution containing  $5 \times 10^6$  cells was subcutaneously injected into the right flank of eight-week-old  
146 female BALB/c nude mice. For the investigation of the influence of dietary methionine on  
147 subcutaneous tumor growth, mice were randomly grouped as indicated in figures or figure legends  
148 after 7 days of injection. Customized diets containing distinct dosage of methionine (weight/weight),  
149 including 0.86% methionine (high dietary methionine), 0.35% methionine (medium dietary  
150 methionine), or 0.18% methionine (low dietary methionine) (Table S5), were orally administered to  
151 the corresponding groups.

152 For the investigation of the effect of celecoxib and cisplatin (CDDP) on xenograft tumor growth  
153 under high dietary methionine condition, these chemical compounds were administered at day 10  
154 after ESCC cell implantation using the following protocols: (1) celecoxib was prepared as a  
155 suspension in 0.5% methylcellulose (w/v) and 0.1% Tween 80 (v/v ) in sterile water and orally  
156 administered to the mice at a dose of 25 mg/kg/day until the mice were killed; (2) CDDP was  
157 dissolved in saline 0.9% solution at a dose of 2 mg/kg and intraperitoneally administered every two  
158 days until the mice were killed.

159 Subcutaneous tumors were measured every three or four days using caliper. The volumes of  
160 tumors were calculated using the formula  $0.5 \times \text{length} \times \text{width}^2$ . Mice were sacrificed three weeks  
161 after cell inoculation. Xenograft tumors were harvested for imaging and weighing. Subsequently,  
162 tumor tissues were flash frozen in liquid nitrogen and stored at -80 °C for further analysis.

163

164 **Carcinogen-induced ESCC mouse model**

165 An orthotopic ESCC mouse model was established by orally administering a well-known chemical  
166 carcinogen 4-nitroquinoline 1-oxide (4-NQO) to six-week-old C57BL/6 female mice as we  
167 previously illustrated [1, 7]. Briefly, 4-NQO stock solution was prepared in propylene glycol at 6  
168 mg/mL and divided into aliquots for storage at -20 °C. Model group was constructed by orally  
169 administering drinking water containing 4-NQO at a concentration of 100 µg/mL *ad libitum* for 16  
170 weeks. Subsequently, model mice were randomly divided into two subgroups: one subgroup was  
171 provided with pure water *ad libitum* for 12 weeks (ESCC mice), while the other subgroup was  
172 supplied with water containing 10 mg/mL methionine *ad libitum* for 12 weeks (ESCC mice with Met  
173 admin). Healthy control group was established by orally administering drinking water containing  
174 1.67% propylene glycol (vol/vol) *ad libitum* for 16 weeks and then pure drinking water for 12 weeks.  
175 At the end of the experiment, all mice were sacrificed and their esophageal tissues were collected  
176 and formalin-fixed paraffin-embedded for further analysis.

177

178 **Cell viability and cell proliferation analysis**

179 Cells were cultured in standard or methionine-free RPMI 1640 medium, with 10% FBS, 100 U/mL  
180 penicillin, and 100 mg/mL streptomycin at 37 °C in 5% CO<sub>2</sub>. At the time points of cell culture as  
181 indicated in the figures or figure legends, cell viability and proliferation were measured using a Cell  
182 Counting Kit-8 (CCK-8) following the manufacturer's instruction.

183

184 **Cell cycle assay**

185 The following protocol was used for cell cycle assay. Cells were digested with trypsin (0.25%) and

186 washed in PBS buffer for three times. Subsequently, each cell sample was resuspended in 200  $\mu$ L  
187 PBS buffer. Next, cells were fixed in ice-cold 70% ethanol for 24 hours. After incubating with  
188 propidium iodide (PI)/RNase staining buffer for 30 minutes at RT, cell cycle feature of each sample  
189 was measured using a flow cytometer (Beckman Coulter, DxFLEX) and analyzed using the FlowJo  
190 software.

191

### 192 **Hematoxylin & eosin and immunohistochemistry staining**

193 Esophageal tissue samples from model mice, which were formalin-fixed paraffin-embedded, were  
194 employed for hematoxylin & eosin (H&E) and immunohistochemistry (IHC) staining as we  
195 previously depicted [1, 7, 8]. IHC staining was performed using antibodies against keratin-14, Ki-67,  
196 and NR4A2.

197 Tissue specimens from three validation cohorts were used to construct tissue microarrays as we  
198 previously described [1, 6-9]. Subsequently, tissue microarrays were stained with antibodies against  
199 SLC7A5, MAT2A, MAT2B, AHCY, METTL3, and NR4A2. Quantitative staining scores of tissue  
200 sections were determined by the percentage of positive cells and staining intensity. The range for  
201 percentage of positive cells was from 0% to 100%. While the staining intensity was defined as 0 for  
202 negative intensity, 1 for weak intensity, 2 for moderate intensity, and 3 for strong intensity. The  
203 normalized staining score of each antibody of each sample was acquired by multiplying the  
204 proportion value of positive cells and the intensity score of the tissue section.

205

### 206 **Western blot assay**

207 Supernatants of cell/tissue lysates were collected through centrifugation at  $12,000 \times g$  for 10 minutes.

208 The concentrations of the supernatants containing total proteins were determined using a BCA Assay  
209 Kit. Protein extracts were denatured by addition of sample loading buffer followed by boiling for 10  
210 minutes. Next, proteins were separated by SDS-PAGE, and then transferred to a PVDF membrane.  
211 After incubation with primary antibodies overnight at 4 °C, the membranes were washed and  
212 incubated with secondary antibodies. Western blot images were captured using a ChemiDocTouch  
213 Imaging System (Bio-rad).

214

### 215 **Quantitative reverse transcription-PCR**

216 Cell or tissue samples were lysed in Trizol reagent and total RNAs were then extracted using an  
217 Ultrapure RNA Kit according to the manufacturer's recommendations. RNAs were reversely  
218 transcribed to complementary DNA (cDNA) using a PrimeScript RT reagent Kit. Quantitative  
219 reverse transcription-PCR (qRT-PCR) assay was performed with a SYBR Premix Ex Taq Kit on an  
220 Applied Biosystems Q5 PCR machine (Applied Biosystems, Foster City, CA, USA).

221

### 222 **m<sup>6</sup>A dot blot**

223 Total RNAs were used for m<sup>6</sup>A dot blot assay. For cellular RNAs, cells were lysed in the Trizol  
224 reagent and total RNAs were extracted using an Ultrapure RNA Kit according to the manufacturer's  
225 instructions. For tissue RNAs, clinical tissue samples were cut into small pieces and homogenized in  
226 the Trizol reagent on ice. Total RNAs of tissues were acquired by using the Ultrapure RNA Kit.

227 The concentrations of acquired RNA samples were determined by the NanoDrop machine. All  
228 RNA samples were diluted to 400 ng/μL in RNase-free water. Next, RNA samples were denatured at  
229 72 °C to disrupt their secondary structures, followed by chilling on ice immediately. Subsequently, 1

230  $\mu$ L purified RNA of each sample was dropped onto the nitrocellulose membrane, followed by  
231 crosslinking in a Stratalinker 2400 UV Crosslinker in the Autocrosslink mode (1,200 microjoules,  
232 25-50 seconds). After being blocked in 5% non-fat milk solution, the membranes were incubated  
233 with anti-m<sup>6</sup>A antibody overnight at 4 °C. Finally, the membranes were washed in TBST buffer three  
234 times and incubated with IgG-HRP. Dot blot images were captured by using a ChemiDocTouch  
235 Imaging System (Bio-rad).

236

### 237 **Gene knockout by CRISPR-Cas9 approach**

238 Two human ESCC cell lines, KYSE150 and Eca109, were used for gene knockout studies according  
239 to our previous protocols [1, 6, 8, 9]. Briefly, the guide RNA (gRNA) of each gene was inserted into  
240 a lenti-CRISPR-V2 plasmid which was digested by the BsmBI endonuclease. The lentivirus was  
241 packed as follows: lenti-CRISPR-V2 vector containing nontarget control (NC) gRNA or gRNAs of  
242 target genes was co-transfected with psPAX2 and pMD2.G plasmids into HEK 293T cell using the  
243 Lipofectamine 3000 reagent according to the manufacturer's recommendations. After 48 hours of  
244 cell culture, the lentivirus supernatant was collected by centrifugation at 3,000  $\times$  g and filtered using  
245 a 0.45  $\mu$ m filter in order to thoroughly remove HEK 293T cells. Subsequently, ESCC cells were  
246 infected with the NC lentivirus or lentivirus expressing target gRNAs in the presence of 8  $\mu$ g/mL  
247 polybrene. Infected ESCC cells were screened with an antibiotic, puromycin, for 48 hours. Of note,  
248 the following gRNAs were used in this study.

249 gRNA of NC: 5'-AAGAAGAATTGGGGATGATG-3';

250 gRNA#1 for *METTL3*: 5'-CAGACCAGAGACTAACGAAC-3';

251 gRNA#2 for *METTL3*: 5'-CTTAGATCTACGGAATCCAG-3';

252 gRNA#1 for *NR4A2*: 5'- ATTACCTGTATGCTAATCGA-3';  
253 gRNA#2 for *NR4A2*: 5'- TTGTCCTTCGATTAGCATAAC-3';  
254 gRNA#1 for *IGF2BP2*: 5'- ACTGGCTTACCTCCCCTGC-3';  
255 gRNA#2 for *IGF2BP2*: 5'- ACATCCCTCCTCACCTGCAG-3'.

256

### 257 **NR4A2 overexpression**

258 The wild-type (WT) full-length coding sequence of *NR4A2* was cloned by a pair of primers  
259 (HindIII-Flag-NR4A2-forward primer:  
260 5'-CCCAAGCTTATGGACTACAAGGACGACGATGACAAGCCTTGTGTTTCAGGCGCAGTATG  
261 G-3'; XbaI-NR4A2-reverse primer: 5'-TGCTCTAGATTAGAAAGGTAAAGTGTCCAGGAAA-3')  
262 when using the cDNA from KYSE150 cells as the template in the presence of the PrimeSTAR® Max  
263 DNA Polymerase. The sequence was then inserted into the pcDNA3.0 vector, which was  
264 pre-treated with HindIII and XbaI. Next, the negative control vector pcDNA3.0 and the recombinant  
265 vector pcDNA3.0-Flag-NR4A2 were transfected into ESCC cells, respectively, according to the  
266 manufacturer's instructions. The transfection was performed using a Lipofectamine 3000  
267 Transfection Reagent following the manufacturer's protocol.

268

### 269 **RNA stability assay**

270 ESCC cells were cultured in distinct media containing 5 µg/mL actinomycin D for 0 hour, 4 hours,  
271 and 8 hours, respectively. Cells were lysed in the Trizol reagent and total RNAs were extracted using  
272 the Ultrapure RNA Kit. Quantitative RT-PCR was conducted to measure the remaining levels of  
273 *NR4A2* mRNA in cells, therefore assessing the RNA stability of *NR4A2* under different treatment

274 conditions.

275

### 276 **RNA immunoprecipitation assay**

277 RNA Immunoprecipitation assay (RIP) was performed using an RIP kit. Briefly, KYSE150 cells  
278 were lysed in the RIP lysis buffer. The supernatant of the RIP lysate was acquired and incubated with  
279 anti-IGF2BP1, anti-IGF2BP2, anti-IGF2BP3, or anti-IgG antibodies in the presence of protein A/G  
280 magnetic beads under the condition of continuous shaking at 4 °C overnight. The  
281 co-immunoprecipitated RNA samples were then purified with wash buffer, followed by incubation in  
282 100% ethanol at -80 °C overnight. Input and co-immunoprecipitated RNAs were analyzed by  
283 qRT-PCR. Finally, the enrichment of *NR4A2* by each antibody was calculated by normalizing to the  
284 input *NR4A2*.

285

### 286 **Site-directed mutagenesis**

287 Wild-type full-length coding sequence of *NR4A2* (*NR4A2*-WT) was cloned using PrimeSTAR® Max  
288 DNA Polymerase and inserted into pcDNA3.0 vector according to manufacturer's instruction. Two  
289 *NR4A2* mutants with A-T substitution in exon 6 (*NR4A2*-Mut1) and exon 8 (*NR4A2*-Mut2),  
290 respectively (shown in Figure 5K), were generated using the QuickMutation™Plus Site-Directed  
291 Mutagenesis Kit. Briefly, different primer pairs and *NR4A2*-WT-pcDNA3.0 as a template were  
292 mixed to perform PCR using BeyoAmp™ Extra-long DNA Polymerase and BeyoAmp™ Buffer.  
293 PCR products were digested with DpnI enzyme and then inserted into the pcDNA3.0 vector. The  
294 recombinant plasmids were transformed into *E.coli DH5a* competent cells for amplification and  
295 sequencing. The primer pairs used for cloning were listed as follows.

296 Primer pair for *NR4A2*-WT:

297 Forward

298 5'-CCCAAGCTTATGGACTACAAGGACGACGATGACAAGCCTTGTGTTTCAGGCGCAGTATG

299 G-3';

300 Reverse 5'-TGCTCTAGATTAGAAAGGTAAAGTGTCCAGGAAA-3';

301 Primer pair for *NR4A2*-Mut1:

302 Forward 5'-CTGCTTTTTGAATCAGCTTTCTTAGATCTGTTTGTCTTCGATTA-3';

303 Reverse 5'-TAATCGAAGGACAAACAGATCTAAGAAAGCTGATTCAAAAAGCAG-3';

304 Primer pair for *NR4A2*-Mut2:

305 Forward 5'-CACCGCCAGCAATAATTGACAAACTTTTCCTGGTCACTTTACCTT-3';

306 Reverse 5'-AAGGTAAAGTGACCAGGAAAAGTTTGTCATTATTGCTGGCGGTG-3'.

307

### 308 **Dual-luciferase reporter assay**

309 Wild-type 3'-UTR fragment of *NR4A2* was cloned using the primer pair of *NR4A2*-3'-UTR-WT in  
310 the presence of PrimeSTAR® Max DNA Polymerase. By using *NR4A2*-3'-UTR-WT as the template,  
311 a mutant 3'-UTR of *NR4A2* (*NR4A2*-Mut3) with A-T substitution as shown in Figure 5K was  
312 synthesized using a QuickMutation™Plus Site-Directed Mutagenesis Kit according to the  
313 manufacturer's instructions. Furthermore, the promoter sequence of *NR4A2* was cloned using the  
314 primer pair of *NR4A2*-promoter. To generate the firefly luciferase (F-luc) reporter construct,  
315 *NR4A2*-3'-UTR-WT, and *NR4A2*-Mut3 were inserted into the XbaI site of the pGL3-Promoter  
316 luciferase reporter plasmid, respectively. While *NR4A2*-promoter was inserted into PGL3-basic  
317 luciferase reporter plasmid. Next, 50 ng recombinant luciferase reporter plasmid with

318 *NR4A2*-3'-UTR-WT, *NR4A2*-Mut3, or *NR4A2*-promoter and 50 ng TK-Renilla luciferase (R-luc)  
319 control plasmids were co-transfected into HEK 293T cells using a Lipofectamine 2000 kit. F-luc and  
320 R-luc activities were measured 48 hours later with the Promega Dual-Luciferase reporter system  
321 (Promega, cat#E1910) according to the supplier's instructions. The relative luciferase activity was  
322 computed by dividing F-luc by R-luc and normalized to individual control for each assay. The primer  
323 pairs used for cloning were listed as follows.

324 Primer pair for *NR4A2*-3'-UTR-WT:

325 Forward 5'-TGCTCTAGAGACCTCCTCCCAAGCACTTCAAAGG-3';

326 Reverse 5'-TGCTCTAGAGTGCCTATAACATTTTCAACCTAGA-3';

327 Primers for *NR4A2*-Mut3:

328 Forward 5'-CCCAAGCACTTCAAAGGATCTGGAATG-3';

329 Reverse 5'-CATTCCAGATCCTTTGAAGTGCTTGGG-3';

330 Primers for *NR4A2*-promoter:

331 Forward 5'-CGGGGTACCTCCTTCTCCCCAGCTCTCCAAA-3';

332 Reverse 5'-CCCAAGCTTGGCTGGACAGGCAAAAGGGA-3'.

333

### 334 **Molecular docking**

335 The structure file of NR4A2 protein (ID: 5Y41) was acquired from Protein Data Bank, while the structure of  
336 celecoxib was obtained from PubChem (CAS ID: 169590-42-5). NR4A2 and celecoxib were designated as the  
337 receptor and ligand, respectively, to conduct molecular docking using Autodock software (version 4.2.6). The  
338 docking box encompassed the entire protein as well as the ligand-receptor docking structures of NR4A2. The  
339 genetic algorithm was employed with 50 semiflexible docking iterations. Other parameters of Autodock were

340 assigned at default settings. Subsequently, the LamarckianGA (4.2) option was selected to generate the  
341 docking parameter file before executing Autodock program. Finally, the docking result was visualized by  
342 using PyMOL (version 2.5).

343

#### 344 **Cellular thermal shift assay (CETSA)**

345 The CETSA was performed as previously illustrated [10]. In brief, ESCC cells were incubated with  
346 vehicle or celecoxib (40  $\mu$ M) for 3 hours, respectively. Cell precipitations were then acquired by  
347 digestion with 0.5% trypsin. After washing twice with PBS, the cell precipitations of each group  
348 were divided into 5 aliquots in PBS buffer. All cell suspensions were frozen at -80 °C and thawed for  
349 three times, then sequentially incubated at 37 °C, 42 °C, 47 °C, 52 °C, and 57 °C for 3 minutes in a  
350 thermal cycler, respectively. Subsequently, all cell suspensions were centrifuged at a speed of  
351 12,000g at 4 °C for 10 minutes to obtain cell supernatants. NR4A2 protein levels in all samples were  
352 assessed by using western blot assay.

353

#### 354 **Untargeted metabolomic profiling**

355 Clinical tissue samples from the discovery cohort were measured using the Pegasus  
356 High-Throughput Gas Chromatography with Time-of-Flight Mass Spectrometer system as we  
357 previously described [1]. While clinical tissue samples from validation cohort 1 and validation cohort  
358 2 were examined using the Ultra High Performance Liquid Chromatography (1290 Infinity LC,  
359 Agilent Technologies) coupled to a tandem Mass Spectrometer system (TripleTOF 6600, AB Sciex)  
360 (UHPLC-MS/MS) by APT Biotechnology Company (Shanghai, China).

361 **Sample preparation** A total of 206 pairs of ESCC and normal adjacent tissues from validation cohort

362 1 (n = 94) and cohort2 (n = 112) were enrolled for metabolomic profiling. Sample preparation was  
363 conducted as previously illustrated [11]. Briefly, tissues were cut to pieces on dry ice and then  
364 homogenized in ultrapure water. Subsequently, for each tissue sample, 200  $\mu$ L supernatant was  
365 collected and thoroughly mixed with 800  $\mu$ L metabolite extraction solution (methanol/acetonitrile,  
366 1:1, vol/vol), followed by centrifugation at a speed of  $14,000 \times g$  at 4 °C for 20 minutes. Next, the  
367 acquired supernatant was dried in vacuum centrifuge. Finally, the residual was re-dissolved in 100  
368  $\mu$ L solvent (acetonitrile/water, 1:1, vol/vol), centrifuged at a speed of  $14,000 \times g$  at 4°C for 20  
369 minutes, and then injected for UHPLC-MS/MS analysis.

370 *UHPLC-MS/MS* Samples were separated in a hydrophilic interaction chromatography (HILIC)  
371 column (2.1 mm  $\times$  100 mm ACQUIY UPLC BEH Amide 1.7  $\mu$ m; Waters, Ireland) installed in the  
372 ultra-high performance liquid chromatography system. For each sample, 2  $\mu$ L volume was injected  
373 into the column at 25°C and at a flow rate of 0.5mL/min. The mobile phase, consisting of buffer A  
374 (25 mM ammonium acetate and 25 mM ammonia hydroxide dissolved in ultrapure water) and buffer  
375 B (acetonitrile), was employed in both ESI positive and negative modes. The gradient elution  
376 procedure was set as follows: 95% buffer B for 0.5 min, linearly reduced to 65% buffer B in 6.5 min,  
377 reduced to 40% buffer B in 1 min and kept for 1 min, and then increased to 95% buffer B in 0.1 min,  
378 with a 3 min re-equilibration period employed.

379 The ESI source conditions were set as follows: ion source gas 1 as 60, ion source gas 2 as 60,  
380 curtain gas as 30, source temperature at 600 °C, and ionspray voltage floating at  $\pm$  5,500 V. In MS  
381 only acquisition, the instrument was set to acquire over the m/z range from 60 Da to 1,000 Da, and  
382 the accumulation time for TOF MS scan was set at 0.20 s/spectra. In auto MS/MS acquisition, the  
383 instrument was set to acquire over the m/z range from 25 Da to 1,000 Da, and the accumulation time

384 for product ion scan was set at 0.05 s/spectra. The product ion scan was obtained using information  
385 dependent acquisition with high sensitivity mode selected. The parameters were set as follows: the  
386 collision energy at 35 V with  $\pm 15$  eV, de-clustering potential as 60 V (+) and -60 V (-), exclude  
387 isotopes within 4 Da, and candidate ions to monitor per cycle at 10.

388

### 389 **Targeted metabolomic measurement**

390 ***Tissue preparation*** Frozen tissue samples stored in liquid nitrogen were taken out and accurately  
391 weighed on dry ice. For each tissue sample, approximately 50 mg tissue was taken and homogenized  
392 in 500  $\mu$ L organic mixture [Formic acid (FA):H<sub>2</sub>O:Acetonitrile (ACN):Methyl alcohol (MeOH),  
393 0.2:20:40:40, vol/vol/vol/vol] for metabolite extraction. The supernatant was acquired by  
394 centrifugation at a speed of 13,000 rpm at 4 °C, and then stored at -80 °C for further analysis.

395 ***Medium and cell preparation*** For metabolite extraction of cell and medium samples, a mixture of  
396 FA:ACN:MeOH (0.2:50:50, vol/vol/vol) and a mixture of FA:H<sub>2</sub>O:ACN:MeOH (0.2:20:40:40,  
397 vol/vol/vol/vol), which were pre-cooled at -80 °C overnight, were used as the precipitating and  
398 quenching reagents, respectively. For each culture medium sample, 200  $\mu$ L of medium was added  
399 into EP tube containing 800  $\mu$ L pre-cooled FA:ACN:MeOH (0.2:50:50, vol/vol/vol) and promptly  
400 centrifuged at 13,000 rpm at 4°C for 15 minutes. Subsequently, 800  $\mu$ L supernatant was acquired  
401 and quickly frozen at -80 °C for further analysis. For the preparation of each cell sample, spent  
402 medium was discarded and culture dishes containing cells were quickly washed three times with PBS  
403 buffer. Next, 1 mL of pre-cooled FA:H<sub>2</sub>O:ACN:MeOH (0.2:20:40:40, vol/vol/vol/vol) was added  
404 into each dish for rapid quenching and precipitating cell samples. After incubating at 4 °C for 15  
405 minutes, cells were scraped down and then lysed by ultrasonication. Of note, during ultrasonication,

406 samples were cooled for 10 seconds on ice after every 10 seconds of ultrasonication to avoid  
407 overheating. After 6 cycles of ultrasonication, lysate in culture dish was transferred into a new EP  
408 tube and centrifugated at 13,000 rpm at 4 °C for 15 minutes. The acquired supernatant was stored at  
409 -80 for further analysis.

410 *Standard curves for quantitative measurement of target metabolites* Standard curves were  
411 established for quantitative measurement of metabolites of interest, including methionine, SAM,  
412 SAH, and Hcy. To evaluate the linearity of the solutions of each standard compound, the standard  
413 curve was constructed by using the concentration ratios between the compound and its corresponding  
414 internal control over concentration gradient as horizontal coordinate and peak area ratios between the  
415 compound and its corresponding internal control over concentration gradient as vertical coordinate,  
416 and then the correlation coefficient value was calculated. Notably, correlation coefficient values for  
417 all standard curves were larger than 0.99, indicating good linearity of these curves.

418 *UHPLC-MS* Samples were separated and analyzed using an ultra-high performance liquid  
419 chromatography (UHPLC) (Shimadzu LC-30AD system, Shimadzu Technologies) coupled to a  
420 Triple Quad 5500 Mass Spectrometer (Sciex, Applied Biosystems) by Shanghai BioNext  
421 Technologies Company (Shanghai, China). A Waters ACQUITY UPLC ®BEH Amide 1.7 µm 2.1 ×  
422 50 mm column was installed in the UHPLC. The composition of the mobile phase was listed as  
423 follows: solution A as a water/acetonitrile solution containing 0.1% formic acid and 1 mM  
424 ammonium acetate (H<sub>2</sub>O/ACN, 95:5, vol/vol) and solution B as an acetonitrile/water solution  
425 containing 0.1% formic acid and 1 mM ammonium acetate (ACN/H<sub>2</sub>O, 95:5, vol/vol). For each  
426 sample, 2 µL volume was injected into the column at 40 °C. The flow rate was set at 400 µL/min.  
427 The gradient elution procedure was set as follows: 0-4 min, solution B was linearly reduced to 60%

428 from 95%; 4-5 min, buffer B was reduced to 60% from 55%; 5.0-5.1 min, buffer B was reduced to  
429 50% from 55%; 5.1-5.6 min, buffer B was kept at 50%; 5.6-5.7 min, buffer B was increased to 95%  
430 from 50%; 5.7-6.5 min, buffer B was kept at 95%. To detect and assess the stability and repeatability  
431 of the measurement system, a set of standard curves were set at the beginning and the end of the  
432 experiment, and these standard chemical samples were also used as quality controls. The standard  
433 compounds in standard curves were used to correct the retention time of the chromatography.

434 Mass spectrometry analysis was performed on a Triple Quad 5500 instrument (Sciex, Applied  
435 Biosystems) with ESI ion source in positive mode. The mass spectrometry parameters were set as  
436 follows: source temperature at 500 °C, ion source gas 1 at 20 psi, ion source gas 2 at 20 psi, curtain  
437 gas at 25 psi, ionspray voltage floating at -5,500 V. Then, the ion pairs were detected using multiple  
438 reaction monitoring mode. The Q1/Q3 ion pairs for the metabolites of interest were listed as follows:  
439 methionine, 150.2/132.9; SAM, 399.2/250.2; SAH, 385.3/133.6; Hcy, 136.1/55.8.

440 Peak area and retention time for each target metabolite were extracted using the Analyst software  
441 (Applied Biosystems Sciex). Standard chemical compounds were used to correct the retention time  
442 of peaks and identify metabolites.

443

#### 444 **RNA-sequencing**

445 RNA-sequencing (RNA-seq) assay was performed by Cloud-Seq Biotech Inc. (Shanghai, China)  
446 following our previous procedure [6]. Total RNAs were extracted from fresh frozen tissues using the  
447 Trizol reagent and purified by removing rRNAs with a NEBNext<sup>®</sup> rRNA Depletion Kit following the  
448 manufacturer's instructions. All RNA analytes were assessed for fragment size, integrity, purity and  
449 concentration. Subsequently, RNA libraries were constructed using a NEBNext<sup>®</sup> Ultra<sup>™</sup> II

450 Directional RNA Library Prep Kit according to the manufacturer's instructions. Libraries were  
451 controlled for quality and quantified using the Bioanalyzer 2100 system (Agilent Technologies, Inc.,  
452 USA). Library sequencing was performed on an illumina Hiseq 4000 sequencer with 150 bp paired  
453 end mode.

454

### 455 **MeRIP-sequencing**

456 Cellular mRNAs were extracted using a NEBNext Poly(A) mRNA Magnetic Isolation Module and a  
457 NEBNext rRNA Depletion Kit. Fragmented RNAs (~200 nucleotides) were incubated with m<sup>6</sup>A  
458 antibody for immunoprecipitation using a methylated RNA immunoprecipitation (MeRIP) m<sup>6</sup>A kit  
459 according to the supplier's instructions. Both the input mRNAs without immunoprecipitation and the  
460 m<sup>6</sup>A-immunoprecipitated mRNAs containing m<sup>6</sup>A peaks were used for library construction using a  
461 NEBNext Ultra RNA library prep kit, and then sequenced with an Illumina NovaSeq instrument with  
462 150bp paired-end reads by Cloud-Seq Biotech Ltd. Co. (Shanghai, China).

463

## 464 **QUANTIFICATION AND STATISTICAL ANALYSIS**

### 465 **Untargeted metabolomic data analysis**

466 The raw data were converted to mzXML files using ProteoWizard software, and then imported into  
467 freely available XCMS software to pick peaks. During the calculation, parameters were set as  
468 follows: centWave m/z = 10 ppm, peakwidth = c(10, 60), prefilter = c(10, 100). For peak grouping,  
469 bw = 5, mzwid = 0.025, minfrac = 0.5. The R package, CAMERA (Collection of Algorithms of  
470 MEtabolite pRofile Annotation), was applied for annotating isotopes and adducts. In the extracted  
471 ion features, only the variables having more than 50% of nonzero measurement values in at least one

472 group were kept. Metabolites were identified by comparing the accuracy m/z value (<10 ppm) and  
473 MS/MS spectra of peaks with an in-house database established with available authentic chemical  
474 standards. Heatmaps of metabolites between two groups were generated using the R package  
475 ComplexHeatmap [12].

476

### 477 **RNA-sequencing data analysis**

478 The quality of raw reads was assessed by Q30 values. After removing sequencing adaptors, short  
479 reads (length < 35 bp) and low-quality reads with software of Cutadapt (v1.18) and Trimmomatic  
480 (v0.35), high-quality clean reads were obtained. Subsequently, by using HISAT2 software (v2.1.0),  
481 clean reads of human data were aligned to the human genome (assembly GRCh38). For the raw  
482 count data of genes, the R package edgeR (v3.26.8) [13] was used to filter lowly expressed items and  
483 to execute normalization to get reads per kilobase per million (RPKM) expression values.  
484 Differentially expressed mRNAs were identified by the cuts of Benjamini-Hochberg adjusted  $p <$   
485 0.05 and fold change (FC)  $> 2$  or  $FC < -2$ .

486

### 487 **MeRIP-sequencing data analysis**

488 Paired-end reads were harvested from Illumina NovaSeq 6000 sequencer. Data quality was evaluated  
489 using Q30 values. The 3'-adaptors were trimmed and low-quality reads were removed using cutadapt  
490 software (v1.9.3). Clean reads of all libraries were aligned to the reference genome (GRCh37/hg19 at  
491 <http://genome.ucsc.edu/cgi-bin/hgGateway>) by Hisat2 software (v2.0.4). Subsequently, methylated  
492 sites on RNAs (peaks) and differentially methylated sites were identified by MACS and diffReps  
493 software, respectively. Differentially methylated RNA sites were identified by the cuts of  $p < 0.005$

494 and  $FC > 2$  or  $FC < -2$ . The differential peaks, overlapping with exons of mRNAs, were figured out  
495 and selected by home-made scripts.

496

#### 497 **Differential abundance scores of metabolic pathways**

498 First, all measured metabolites were mapped onto KEGG pathways. After determining which  
499 metabolites were significantly increased/decreased in abundance, differential abundance (DA) scores  
500 of metabolic pathways were calculated using an algorithm as depicted previously [14]. DA captures  
501 the tendency for a pathway to have increased/decreased levels of metabolites, compared to a control  
502 group. DA score is defined as  $DA = (\text{No. of metabolites increased} - \text{no. of metabolites decreased}) /$   
503  $\text{No. of measured metabolites in pathway.}$

504

#### 505 **Prognosis-risk score of the methionine cycle metabolites**

506 To evaluate the association between the methionine cycle activity and ESCC patient prognosis, four  
507 intratumoral metabolites (homocysteine, SAM, methionine, and SAH) from validation cohort 1 and  
508 validation cohort 2, which are involved in the methionine cycle and presented in Figure 1D, were  
509  $\log_2$ -transformed and then used to generate prognosis-risk score (PRS) for each patient. According  
510 to the algorithm we reported previously [15], a predictive principal component analysis (PCA) model  
511 was fitted in the validation cohort 1 using these four metabolites, and this PCA model was used to  
512 generate PRS for each patient in validation cohort 1 and to predict PRS for each case in validation  
513 cohort 2. The first principal component (a weighted average expression of four methionine cycle  
514 metabolites) was employed as PRS, as it accounted for the largest variability of the data. The 70<sup>th</sup>  
515 percentile of PRS values in validation cohort 1 was used as the cutoff value to divide patients from

516 validation cohort 1 and validation cohort 2 into two groups: those with low and high PRS.

517

### 518 **Download and analysis of the public GEO microarray dataset**

519 An GEO dataset, GSE23400, was downloaded from the NCBI Gene Expression Omnibus  
520 (<http://www.ncbi.nlm.nih.gov/geo/>). This dataset was normalized using the R function `rma` in the  
521 Bioconductor package `affy` and then  $\log_2$ -transformed.

522

### 523 **Statistical analysis**

524 Significant differences between two groups were computed using Wilcoxon's rank-sum test for data  
525 with skewed distribution or Student's t test for data with normal distribution. Survival analysis was  
526 carried out by means of Kaplan-Meier method followed with log-rank test. Multivariate Cox  
527 regression models were fitted using `enter` method to obtain hazard ratio values.

528 Statistical analysis was conducted with R software (R version 3.6.1, <http://www.r-project.org>).

529 All statistical tests were 2-tailed, and p values less than 0.05 were considered significant.

530

531

### 532 **References**

- 533 1. X. Jin, L. Liu, J. Wu, X. Jin, G. Yu, L. Jia *et al.*, A multi-omics study delineates new  
534 molecular features and therapeutic targets for esophageal squamous cell carcinoma. *Clin*  
535 *Transl Med* **11**, e538 (2021).
- 536 2. M. B. Amin, F. L. Greene, S. B. Edge, C. C. Compton, J. E. Gershenwald, R. K. Brookland *et*  
537 *al.*, The Eighth Edition AJCC Cancer Staging Manual: Continuing to build a bridge from a  
538 population-based to a more "personalized" approach to cancer staging. *CA Cancer J Clin* **67**,  
539 93-99 (2017).

- 540 3. V. E. Strong, T. A. D'Amico, L. Kleinberg, J. Ajani, Impact of the 7th Edition AJCC staging  
541 classification on the NCCN clinical practice guidelines in oncology for gastric and  
542 esophageal cancers. *J Natl Compr Canc Netw* **11**, 60-66 (2013).
- 543 4. J. A. Ajani, T. A. D'Amico, D. J. Bentrem, J. Chao, C. Corvera, P. Das *et al.*, Esophageal and  
544 Esophagogastric Junction Cancers, Version 2.2019, NCCN Clinical Practice Guidelines in  
545 Oncology. *J Natl Compr Canc Netw* **17**, 855-883 (2019).
- 546 5. J. A. Ajani, T. A. D'Amico, D. J. Bentrem, D. Cooke, C. Corvera, P. Das *et al.*, Esophageal  
547 and Esophagogastric Junction Cancers, Version 2.2023, NCCN Clinical Practice Guidelines  
548 in Oncology. *J Natl Compr Canc Netw* **21**, 393-422 (2023).
- 549 6. W. L. Chen, X. Jin, M. Wang, D. Liu, Q. Luo, H. Tian *et al.*, GLUT5-mediated fructose  
550 utilization drives lung cancer growth by stimulating fatty acid synthesis and  
551 AMPK/mTORC1 signaling. *JCI Insight* **5**, (2020).
- 552 7. L. Liu, J. Wu, M. Shi, F. Wang, H. Lu, J. Liu *et al.*, New Metabolic Alterations and A  
553 Predictive Marker Pipecolic Acid in Sera for Esophageal Squamous Cell Carcinoma.  
554 *Genomics Proteomics Bioinformatics* **20**, 670-687 (2022).
- 555 8. D. Liu, C. Dong, F. Wang, W. Liu, X. Jin, S. L. Qi *et al.*, Active post-transcriptional  
556 regulation and ACLY-mediated acetyl-CoA synthesis as a pivotal target of  
557 Shuang-Huang-Sheng-Bai formula for lung adenocarcinoma treatment. *Phytomedicine* **113**,  
558 154732 (2023).
- 559 9. D. Liu, X. Jin, G. Yu, M. Wang, L. Liu, W. Zhang *et al.*, Oleanolic acid blocks the purine  
560 salvage pathway for cancer therapy by inactivating SOD1 and stimulating lysosomal  
561 proteolysis. *Mol Ther Oncolytics* **23**, 107-123 (2021).
- 562 10. P. Luo, D. Liu, Q. Zhang, F. Yang, Y. K. Wong, F. Xia *et al.*, Celastrol induces ferroptosis in  
563 activated HSCs to ameliorate hepatic fibrosis via targeting peroxiredoxins and HO-1. *Acta*  
564 *Pharm Sin B* **12**, 2300-2314 (2022).

- 565 11. F. Kou, B. Zhu, W. Zhou, C. Lv, Y. Cheng, H. Wei, Targeted metabolomics reveals dynamic  
566 portrayal of amino acids and derivatives in triple-negative breast cancer cells and culture  
567 media. *Mol Omics* **17**, 142-152 (2021).
- 568 12. Z. Gu, R. Eils, M. Schlesner, Complex heatmaps reveal patterns and correlations in  
569 multidimensional genomic data. *Bioinformatics* **32**, 2847-2849 (2016).
- 570 13. M. D. Robinson, D. J. McCarthy, G. K. Smyth, edgeR: a Bioconductor package for  
571 differential expression analysis of digital gene expression data. *Bioinformatics* **26**, 139-140  
572 (2010).
- 573 14. A. A. Hakimi, E. Reznik, C. H. Lee, C. J. Creighton, A. R. Brannon, A. Luna *et al.*, An  
574 Integrated Metabolic Atlas of Clear Cell Renal Cell Carcinoma. *Cancer cell* **29**, 104-116  
575 (2016).
- 576 15. W. L. Chen, J. H. Wang, A. H. Zhao, X. Xu, Y. H. Wang, T. L. Chen *et al.*, A distinct glucose  
577 metabolism signature of acute myeloid leukemia with prognostic value. *Blood* **124**,  
578 1645-1654 (2014).
- 579

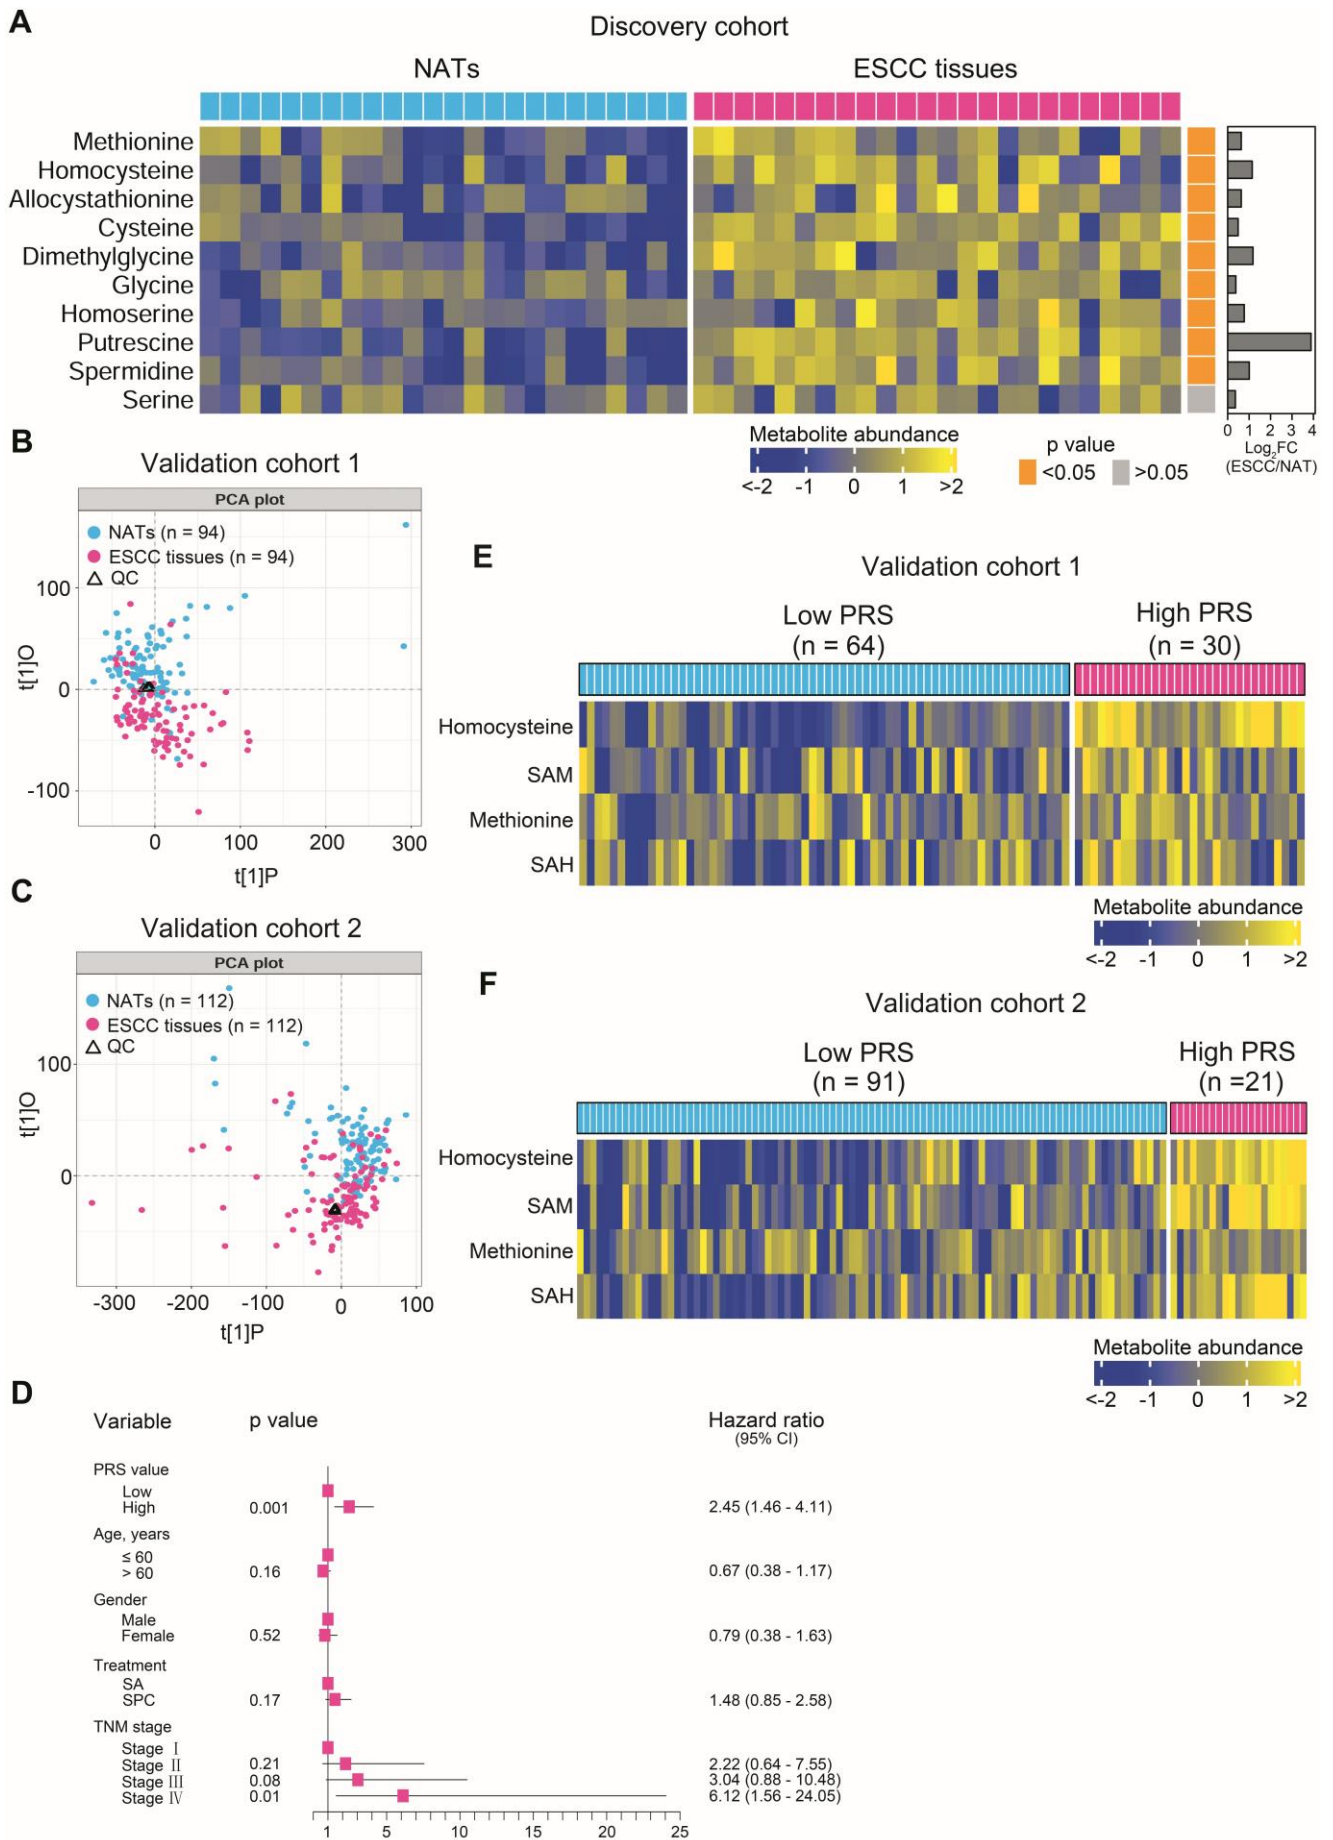

581 **Figure S1. Related to Figure 1. Activity and prognostic significance of the methionine cycle in**  
582 **clinical ESCC tissues of patients.**

583 (A) Comparison of the metabolites involved in methionine metabolism between tumor tissues and  
584 matched NATs derived from the discovery cohort, which consisted of 24 treatment-naive patients  
585 with ESCC.

586 (B and C) PCA score plots of metabolomic data of validation cohort 1 (B) and validation cohort 2  
587 (C). The quality control samples in both validation cohorts are clustered together with low dispersion,  
588 indicating low systemic variation during the measurement.

589 (D) Forest plot showing DFS hazard ratios of PRS and several well-known clinical parameters  
590 derived from a multivariate Cox regression model fitted using the combined validation cohort 1 and  
591 validation cohort 2.

592 (E and F) Heatmaps showing the intratumoral levels of four metabolites involved in the methionine  
593 cycle between patients with high and low PRS values in validation cohort 1 (E) and validation cohort  
594 2 (F).

595 \*\*  $p < 0.01$ , \*\*\*  $p < 0.001$  (Wilcoxon rank-sum test).

596

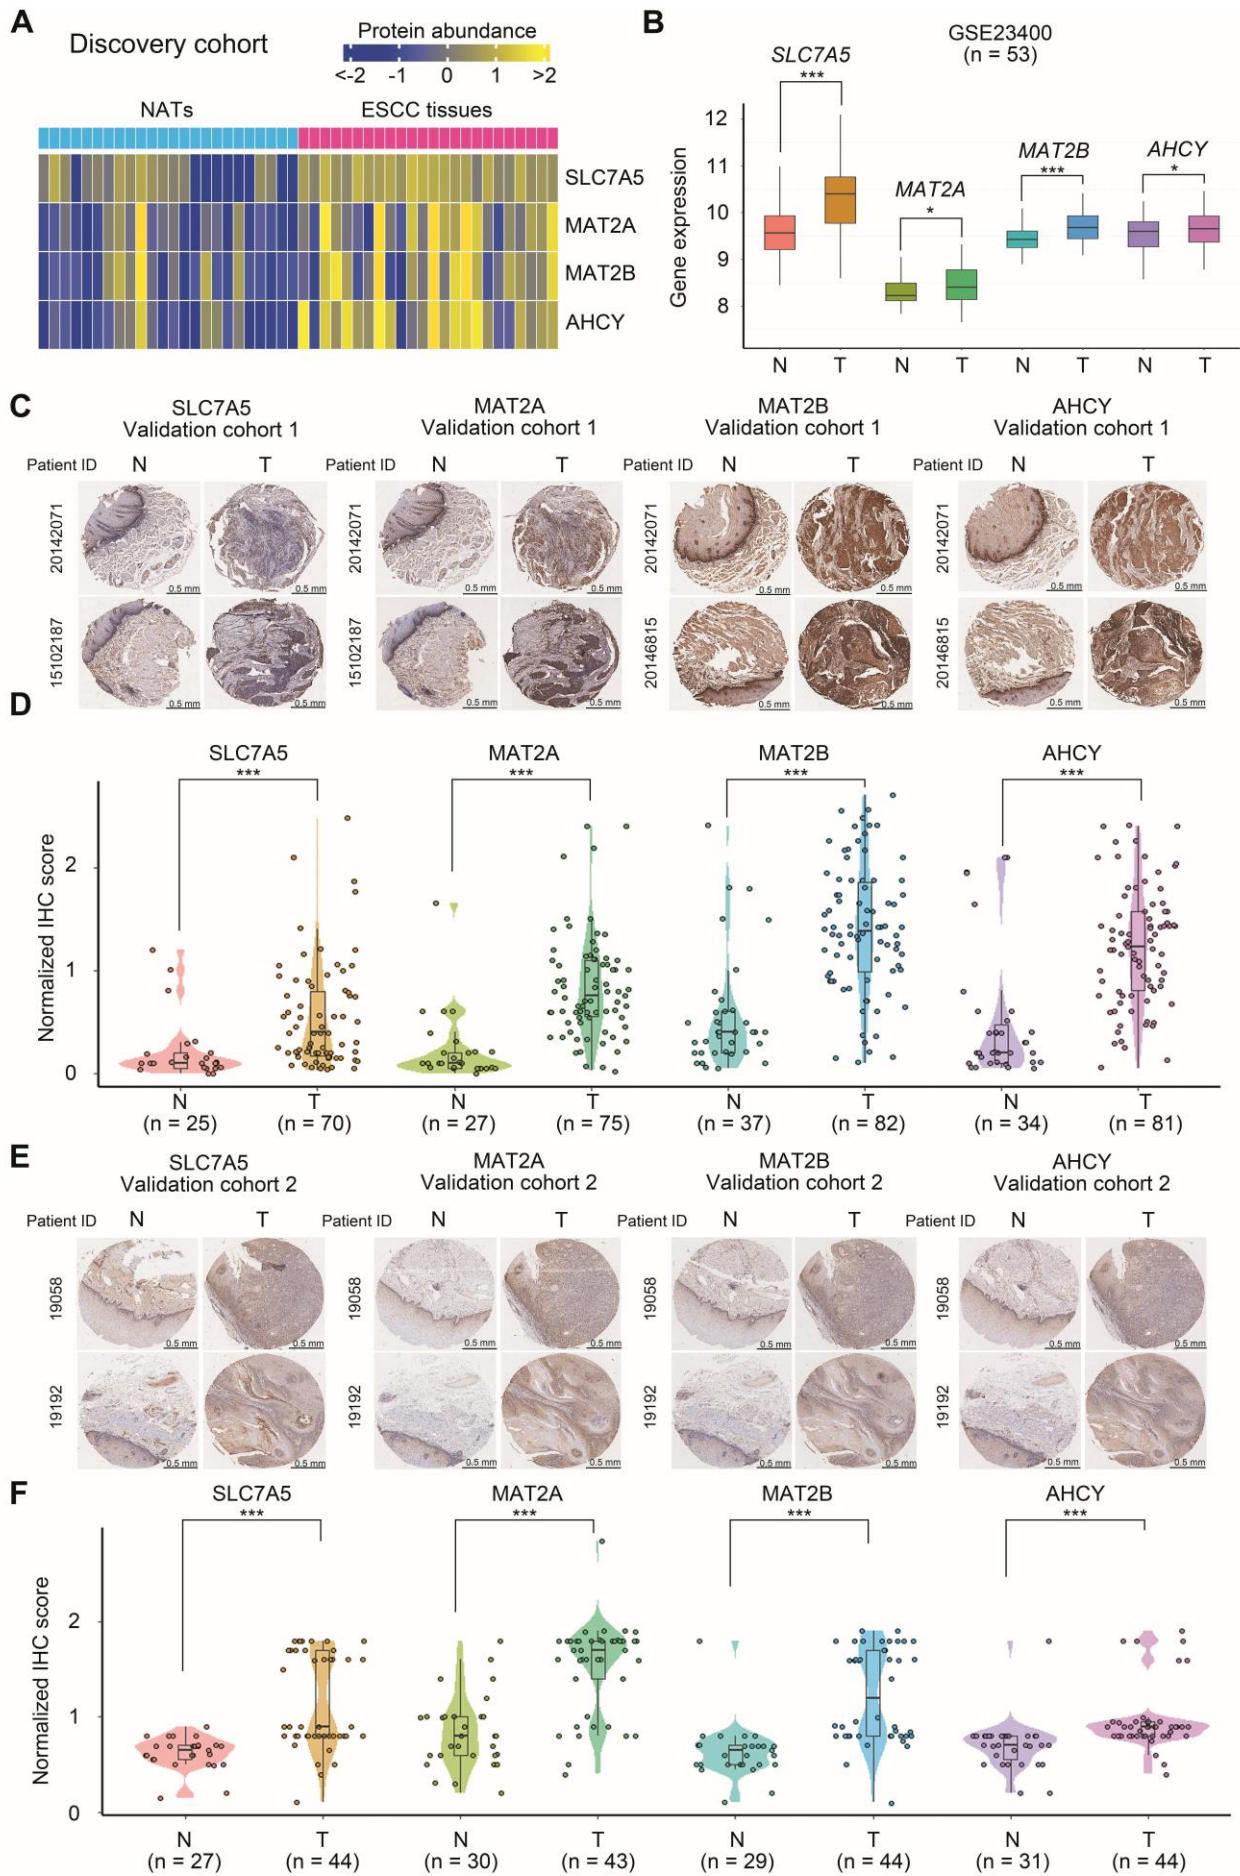

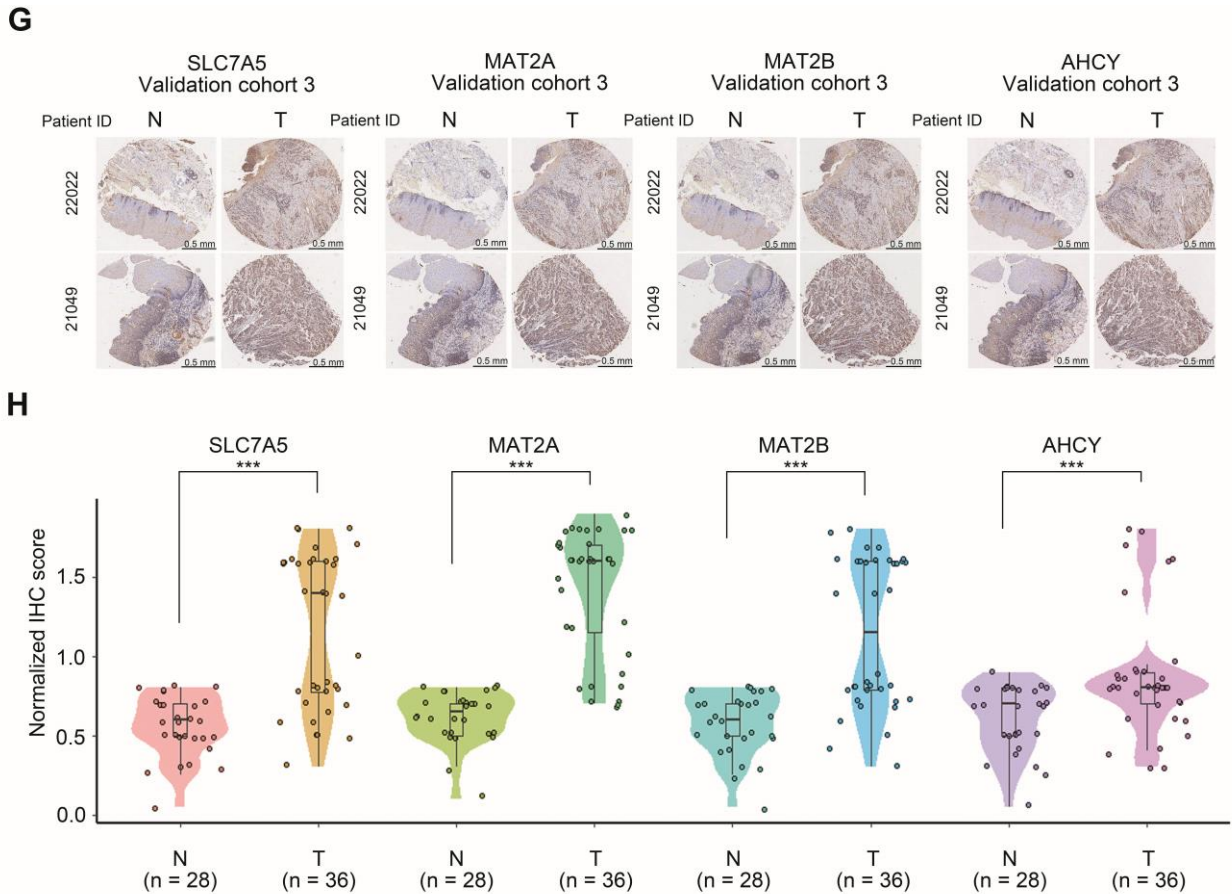

598

599 **Figure S2. Related to Figure 1. Increased expression of methionine transporter and metabolic**  
600 **enzymes in clinical ESCC tissues.**

601 (A) Proteomic profiling showing the protein abundance of SLC7A5, MAT2A, MAT2B, and AHCY  
602 between clinical ESCC tissues and matched NATs from the discovery cohort.

603 (B) Comparison of mRNA levels of *SLC7A5*, *MAT2A*, *MAT2B*, and *AHCY* between clinical ESCC  
604 tissues and matched NATs using the public gene expression dataset GSE23400.

605 (C-H) Protein levels of SLC7A5, MAT2A, MAT2B, and AHCY between clinical ESCC tissues and  
606 NATs derived from validation cohort 1 (C and D), validation cohort 2 (E and F) and validation cohort  
607 3 (G and H), respectively. Representative IHC images (C, E and G) and statistical violin-box-scatter  
608 plots (D, F and H) were presented.

609 \* $p < 0.05$ , \*\*\* $p < 0.001$  (Wilcoxon rank-sum test).

610

611

612

**A**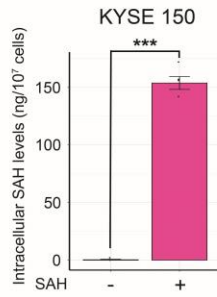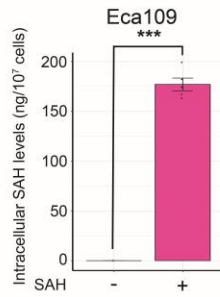**B**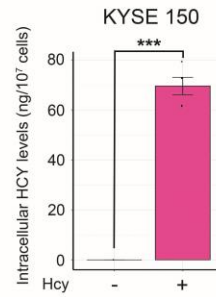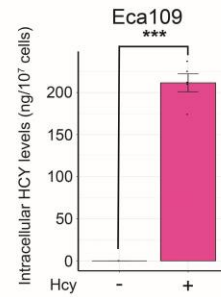**C**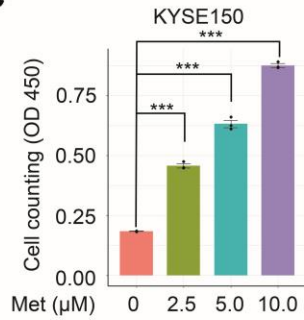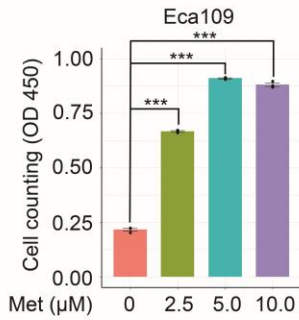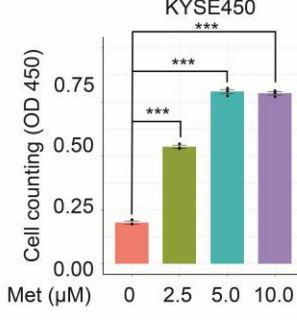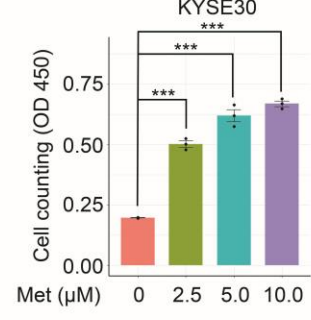**D**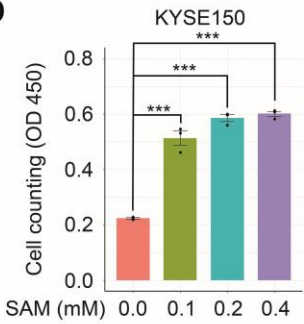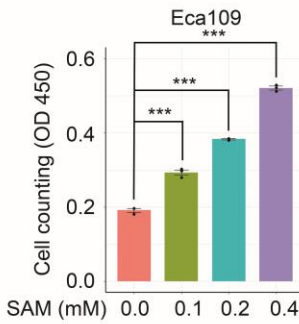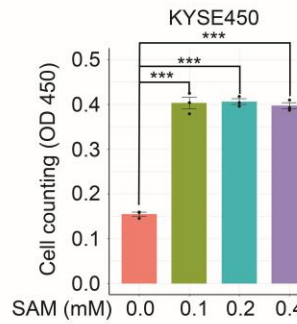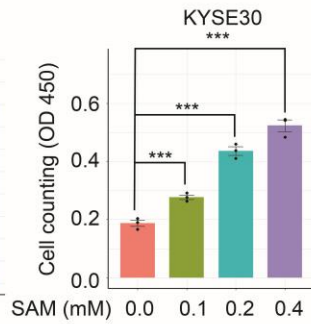**E**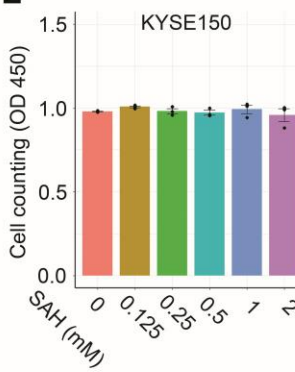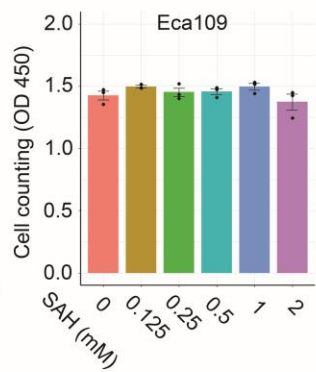**F**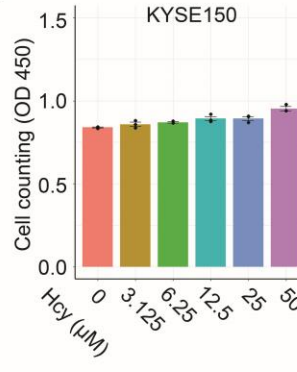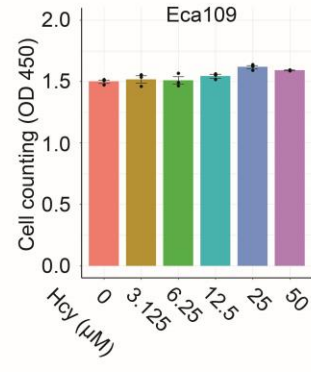**G**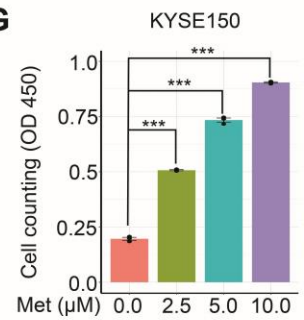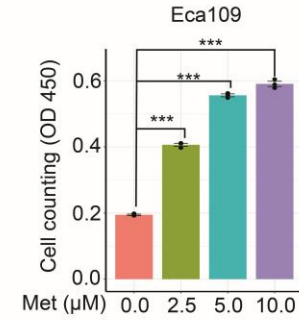**H**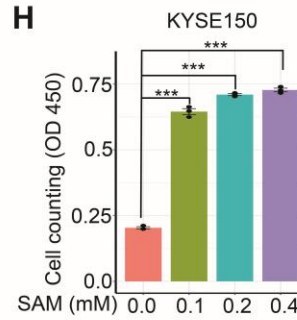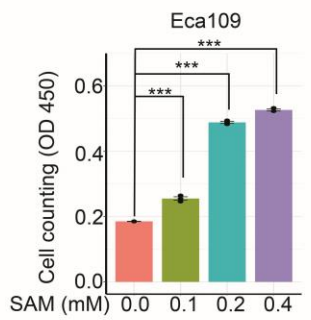

613

614

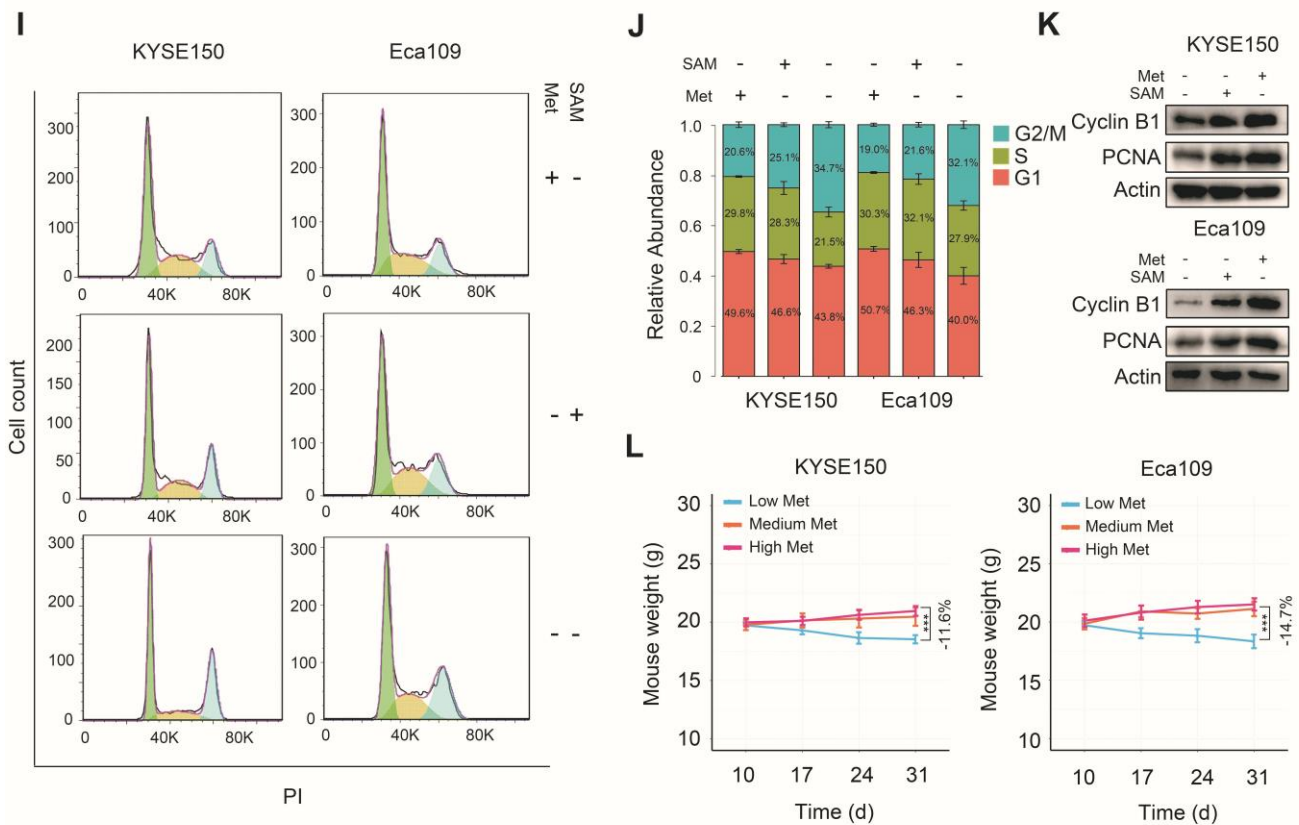

615

616 **Figure S3. Related to Figure 2. Exogenous SAH and Hcy uptake by ESCC cells, influence of**  
 617 **methionine and its downstream metabolites on ESCC cell growth and cell cycle progression,**  
 618 **and impact of dietary methionine on the body weight of mice.**

619 (A and B) Comparison of intracellular SAH (C) and Hcy (D) levels between ESCC cells cultured in  
 620 medium with 0.5 mM SAH or 50  $\mu$ M Hcy and methionine/SAH/Hcy-free medium for 24 hours.

621 (C-F) Methionine and SAM (C and D), but not SAH and Hcy (E and F), promoted ESCC cell  
 622 proliferation in a dose-dependent manner *in vitro*.

623 (G and H) Methionine (G) and SAM (H) boosted ESCC cell propagation in a dose-dependent  
 624 manner in the dialyzed medium *in vitro*.

625 (I) Influence of methionine and SAM on cell cycle of ESCC cells.

626 (J) Quantification of the percentage values of ESCC cells at different cell cycle phases from (I).

627 (K) Western blot assays showing the influence of methionine and SAM on the expression of a G2/M  
 628 progression marker, cyclin B1, and a cell proliferation marker PCNA.

629 (L) Impact of different levels of dietary methionine on the body weight of mice harboring  
 630 subcutaneous KYSE150 or Eca109 tumors.

631 Error bars represent mean  $\pm$  SEM. \*  $p < 0.05$ , \*\*  $p < 0.01$ , \*\*\*  $p < 0.001$  (Student's t test).

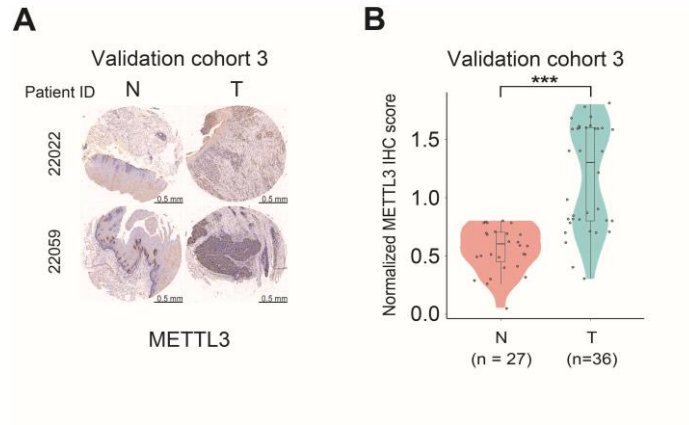

632

633

634 **Figure S4. Related to Figure 3. Comparison of METTL3 expression between ESCC tissues and**  
 635 **NATs from validation cohort 3.**

636 (A) Representative IHC images.

637 (B) Statistical violin-box-scatter plots.

638 \*\*\*  $p < 0.001$  (Wilcoxon rank-sum test).

639

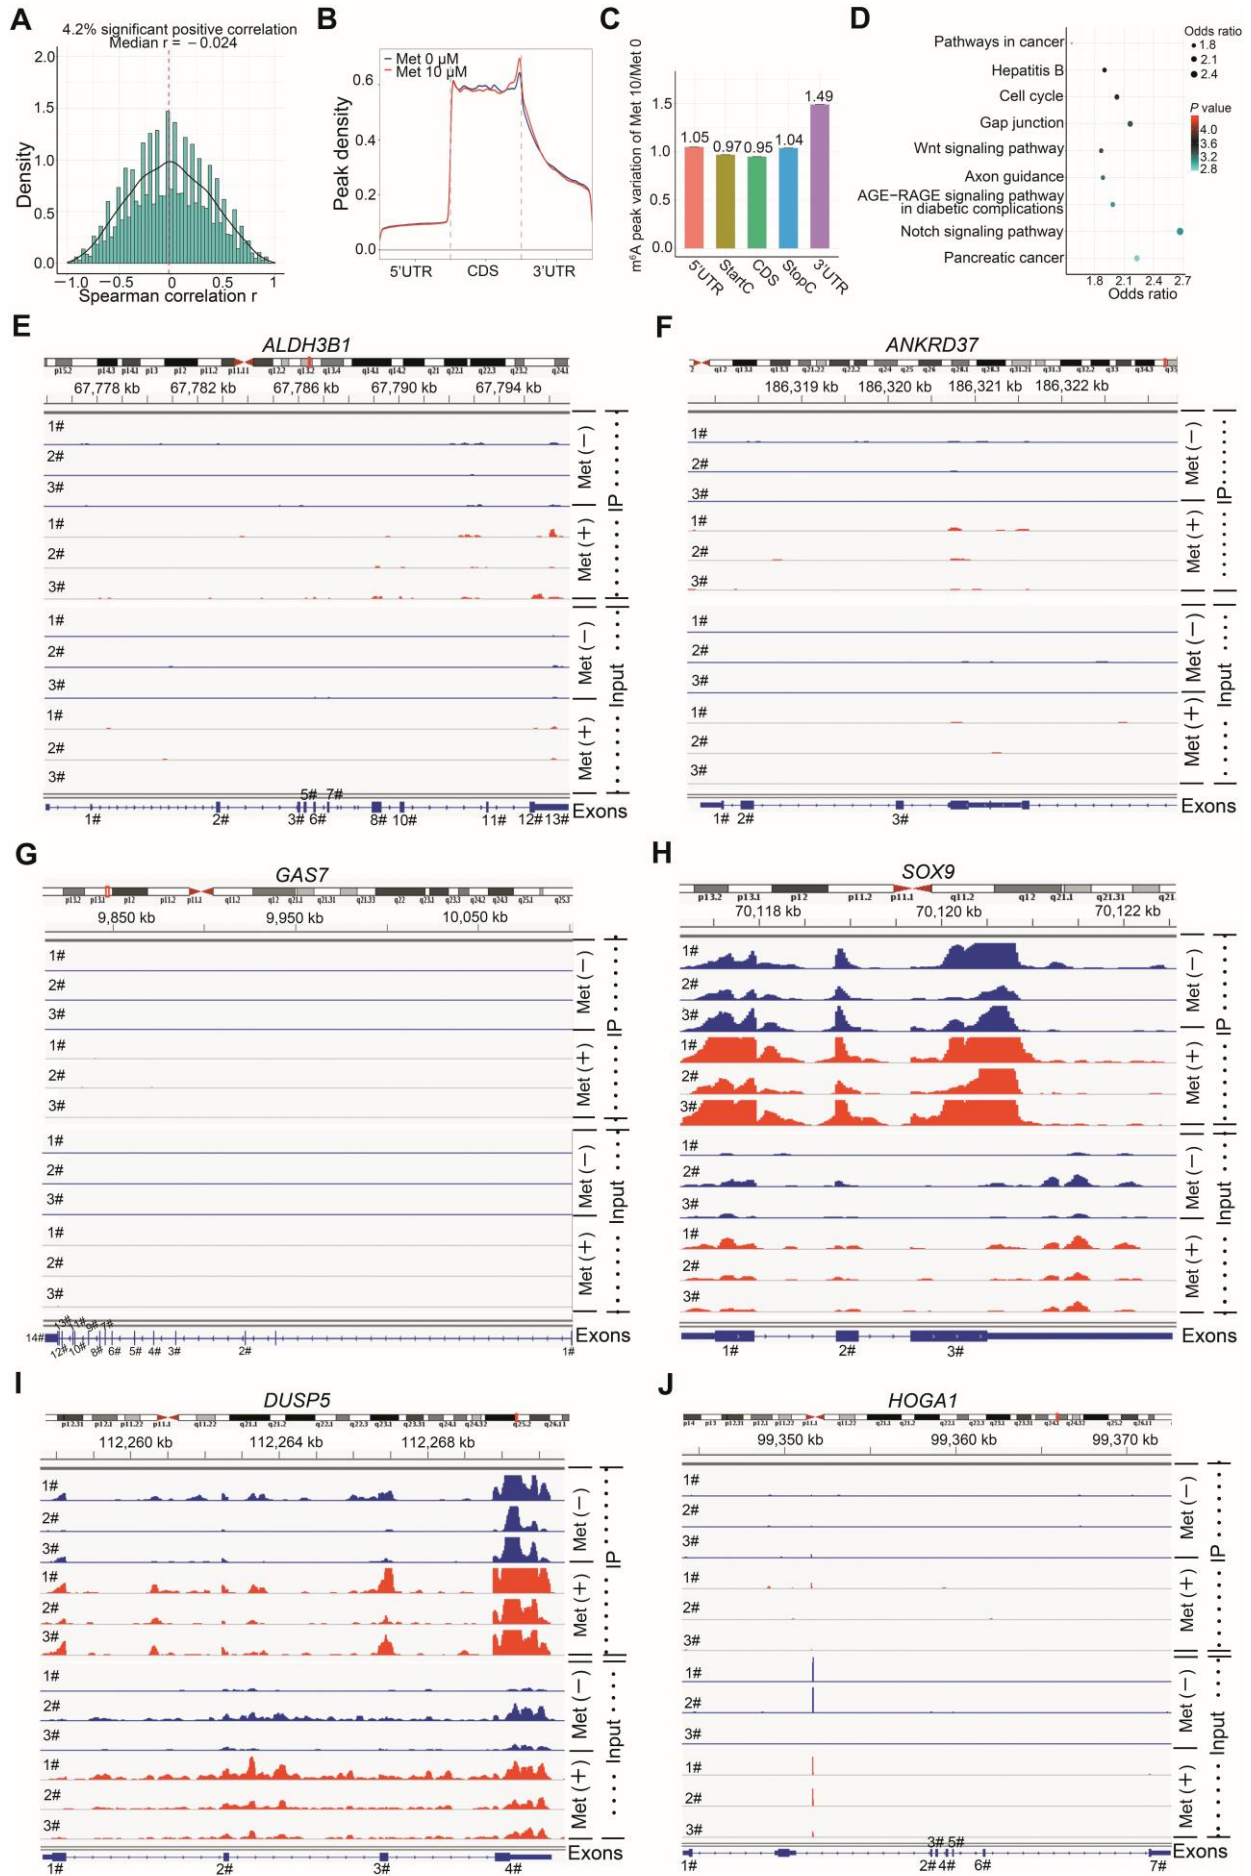

641 **Figure S5. Related to Figure 4. Correlation analysis between the gene expression levels in the**  
642 **two different experimental settings, and the influence of methionine on mRNA m<sup>6</sup>A**  
643 **methylation of KYSE150 cells.**

644 (A) Density plot of Spearman correlation coefficient *r* values between genes in methionine-treated  
645 KYSE150 cells *in vitro* and esophageal tissues from 4-NQO-induced mice with methionine  
646 administration. Notably, only 4.2% of genes exhibit a significant positive correlation, and the median  
647 correlation coefficient *r* value registers at a relatively low -0.24.

648 (B) Distribution of m<sup>6</sup>A peaks at different mRNA regions between KYSE150 cells cultured in  
649 medium with 10 μM methionine and methionine-free medium.

650 (C) Bar plots displaying the ratios of percentage values of m<sup>6</sup>A peaks at different mRNA regions in  
651 KYSE150 cells. The ratio value at a specific mRNA region was calculated by dividing the  
652 percentage of m<sup>6</sup>A peak number of KYSE150 cells treated with methionine by the percentage of m<sup>6</sup>A  
653 peak number of KYSE150 cells treated without methionine.

654 (D) KEGG pathway enrichment analysis of gene transcripts with significantly perturbed m<sup>6</sup>A  
655 modification.

656 (E-J) Analysis of m<sup>6</sup>A peaks in *ALDH3B1*, *ANKRD37*, *GAS7*, *SOX9*, *DUSP5*, and *HOGA1* mRNAs  
657 between KYSE150 cells cultured in medium with 10 μM methionine and methionine-free medium.

658 UTR, untranslated regions; CDS, coding sequence.

659

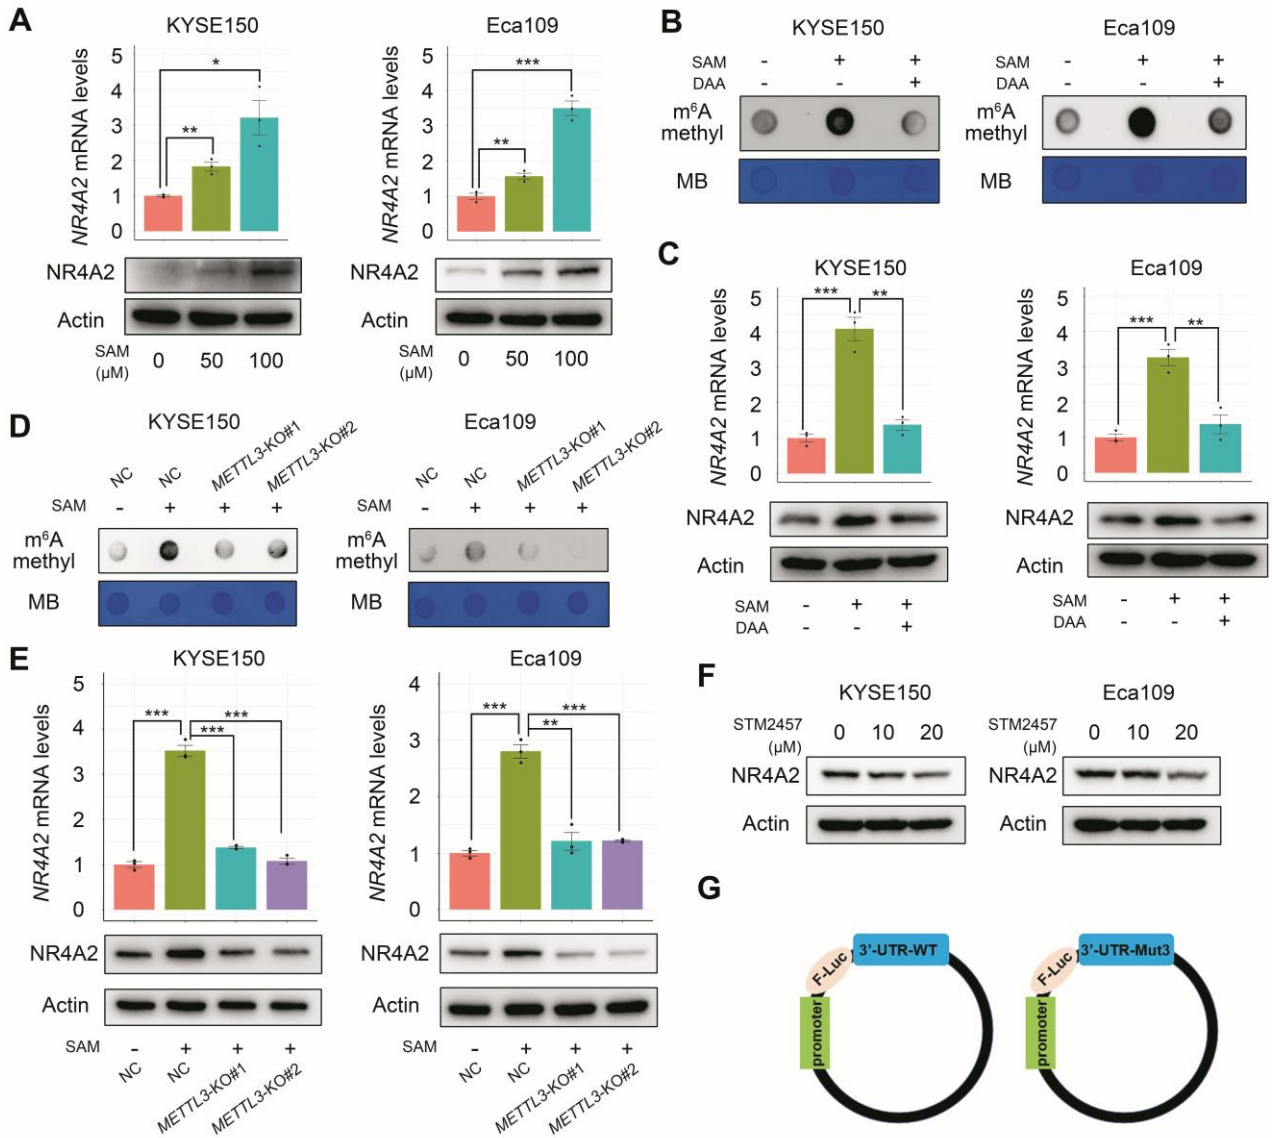

661

662 **Figure S6. Related to Figure 5. SAM eliciting NR4A2 expression in ESCC cells via**  
 663 **METTL3-mediated RNA m<sup>6</sup>A methylation, and construction of the fusion expression of**  
 664 **wild-type or mutant 3'-UTR fragment of NR4A2 with firefly luciferase reporter.**

665 (A) SAM eliciting NR4A2 expression at both mRNA and protein levels in KYSE150 and Eca109  
 666 cells. Cells were cultured in methionine-free medium for 24 hours.

667 (B and C) Treatment with the methylation inhibitor DAA at 10  $\mu$ M for 24 hours influencing  
 668 SAM-induced RNA m<sup>6</sup>A methylation (B) and NR4A2 expression at both mRNA and protein levels  
 669 (C) in ESCC cells. Cells were cultured in methionine-free medium.

670 (D) Impact of *METTL3* abrogation on SAM-induced RNA m<sup>6</sup>A methylation in ESCC cells. Cells

671 were cultured in methionine-free medium.

672 (E) Negative influence of SAM-induced NR4A2 expression at both mRNA and protein levels in  
673 ESCC cells by *METTL3* ablation. Cells were cultured in methionine-free medium.

674 (F) Influence of STM2457 treatment on NR4A2 expression in ESCC cells. Cells were cultured in  
675 complete medium.

676 (G) Schematic diagram showing the fusion of wild-type or mutant 3'-UTR fragment of *NR4A2* with  
677 firefly luciferase reporter. The mutant 3'-UTR fragment contains an A-T substitution in m<sup>6</sup>A  
678 consensus sequence as depicted in Figure 5K.

679 Error bars represent mean  $\pm$  SEM. \*  $p < 0.05$ , \*\*  $p < 0.01$ , \*\*\*  $p < 0.001$  (Student's t test).

680

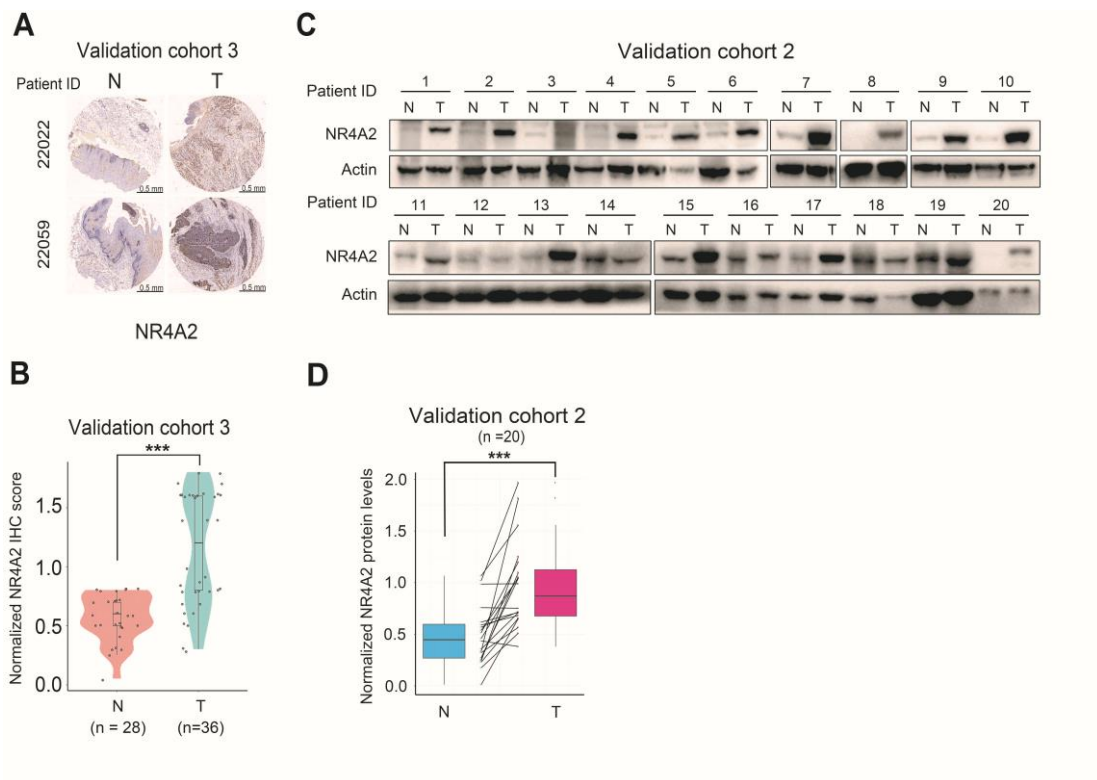

681

682 **Figure S7. Related to Figure 7. Increased expression of NR4A2 in clinical ESCC tissues.**

683 (A and B) IHC staining analysis comparing NR4A2 protein levels between clinical ESCC tissues and  
684 NATs derived from validation cohort 3. Representative IHC images (A) and statistical  
685 violin-box-scatter plots (B) are shown.

686 (C and D) Western blot assay comparing NR4A2 protein abundance between clinical ESCC tissues  
687 and paired NATs derived from validation cohort 2. Statistical analysis is shown in (D).

688 \*\*\*  $p < 0.001$  (Wilcoxon rank-sum test).

689

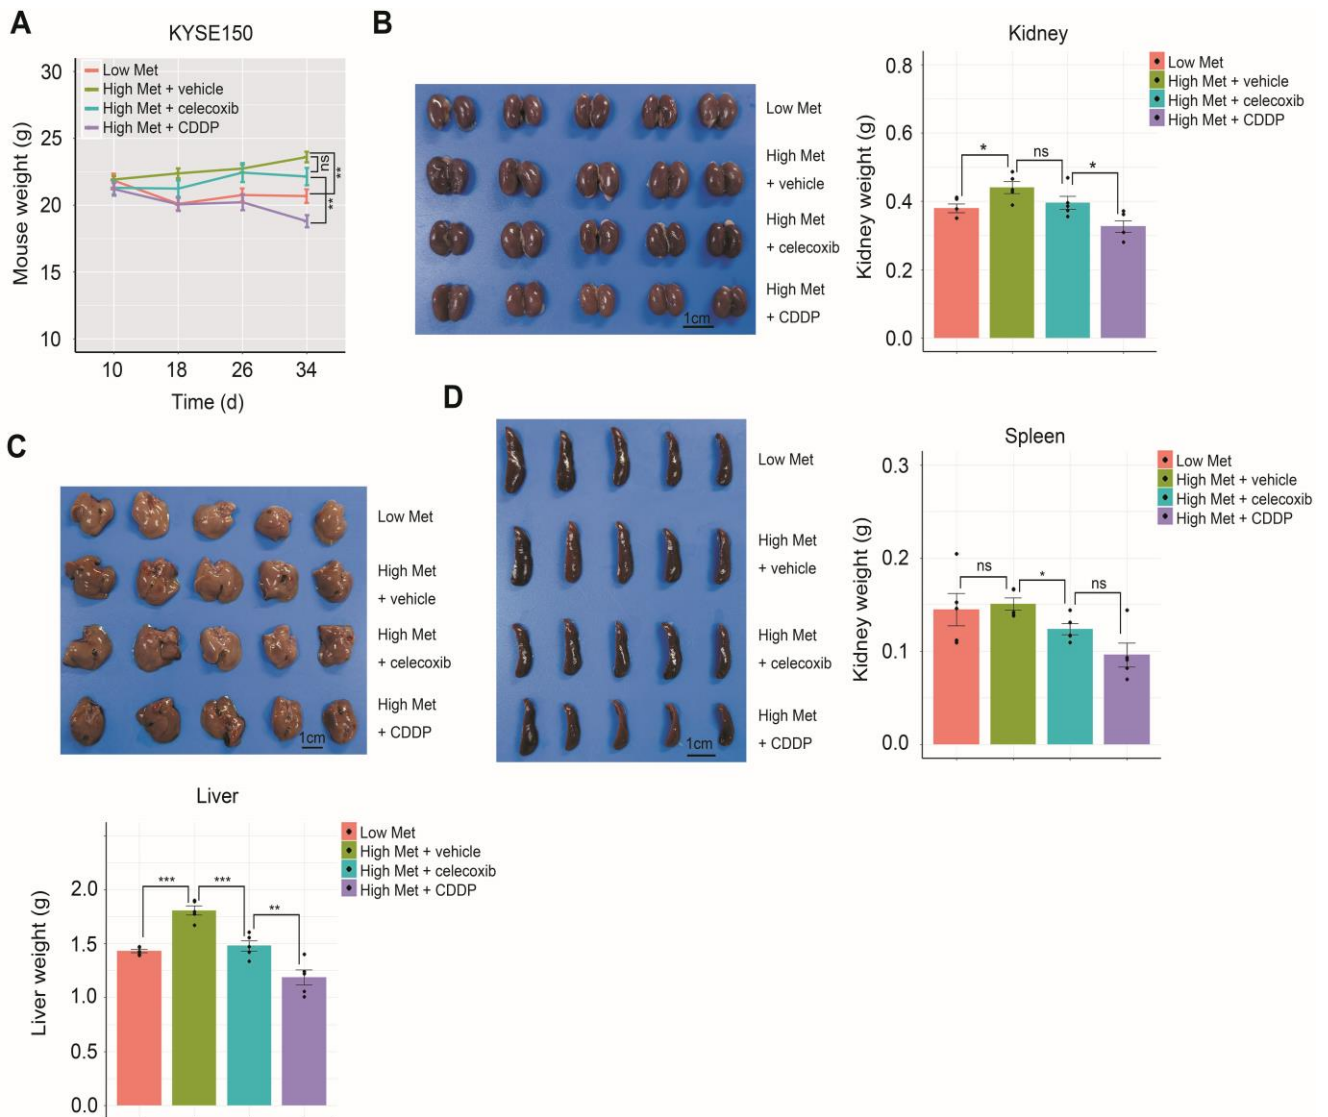

690

691 **Figure S8. Related to Figure 8. Side effect analysis of oral celecoxib administration in mice**  
 692 **harboring KYSE150 xenograft tumors.**

693 (A) Comparison of the mouse weight over time among four treatment groups.

694 (B) Comparison of the kidney weight among four treatment groups.

695 (C) Comparison of the liver weight among four treatment groups.

696 (D) Comparison of the spleen weight among four treatment groups.

697 Ns, no significance.

698 Error bars represent mean  $\pm$  SEM. \*  $p < 0.05$ , \*\*  $p < 0.01$ , \*\*\*  $p < 0.001$  (Student's t test).

699

**Table S1. Basic characteristics of the discovery cohort, related to Figure 1.**

| Characteristic                          | ESCC (n = 24) |
|-----------------------------------------|---------------|
| Age, years                              |               |
| Median (range)                          | 68 (50-76)    |
| ≥ 60 years, no. (%)                     | 21 (87.5)     |
| < 60 years, no. (%)                     | 3 (12.5)      |
| Sex, no. (%)                            |               |
| Male                                    | 15 (62.5)     |
| Female                                  | 9 (37.5)      |
| Alcohol consumption (habitual), no. (%) |               |
| Never                                   | 22 (91.7)     |
| Previous                                | 2 (8.3)       |
| Smoking status, no. (%)                 |               |
| Never smoker                            | 20 (83.3)     |
| Ex-smoker                               | 4 (16.7)      |
| Hypertension, no. (%)                   |               |
| Yes                                     | 5 (20.8)      |
| No                                      | 19 (79.2)     |
| Diabetes, no. (%)                       |               |
| Yes                                     | 3 (12.5)      |
| No                                      | 21 (87.5)     |
| Histological type, no. (%)              |               |
| Squamous-cell carcinoma                 | 24 (100)      |
| Other                                   | 0             |
| Treatment protocol, no. (%)             |               |
| Surgery alone                           | 19 (79.2)     |
| Surgery plus adjuvant chemotherapy      | 5 (20.8)      |
| Clinical T stage, no. (%)               |               |
| T1                                      | 1 (4.2)       |
| T2                                      | 3 (12.5)      |
| T3                                      | 20 (83.3)     |
| Clinical N stage, no. (%)               |               |
| N0                                      | 14 (58.3)     |
| N1                                      | 8 (33.3)      |
| N2                                      | 0             |
| N3                                      | 2 (8.3)       |
| Clinical stage group, no. (%)           |               |
| I                                       | 1 (4.2)       |
| II                                      | 14 (58.3)     |
| III                                     | 7 (29.2)      |
| IV                                      | 2 (8.3)       |

**Table S2. Basic characteristics of the validation cohort 1, related to Figure 1.**

| Characteristic                          | ESCC (n = 94) |
|-----------------------------------------|---------------|
| Age, years                              |               |
| Median (range)                          | 64 (49-79)    |
| ≥ 60 years, no. (%)                     | 70 (74.5)     |
| < 60 years, no. (%)                     | 24 (25.5)     |
| Sex, no. (%)                            |               |
| Male                                    | 71 (75.5)     |
| Female                                  | 23 (24.5)     |
| Alcohol consumption (habitual), no. (%) |               |
| Never                                   | 56 (59.6)     |
| Previous                                | 38 (40.4)     |
| Smoking status, no. (%)                 |               |
| Never smoker                            | 53 (56.4)     |
| Ex-smoker                               | 41 (43.6)     |
| Hypertension, no. (%)                   |               |
| Yes                                     | 18 (19.1)     |
| No                                      | 76 (80.9)     |
| Diabetes, no. (%)                       |               |
| Yes                                     | 4 (4.3)       |
| No                                      | 90 (95.7)     |
| Histological type, no. (%)              |               |
| Squamous-cell carcinoma                 | 94 (100)      |
| Other                                   | 0             |
| Treatment protocol, no. (%)             |               |
| Surgery alone                           | 68 (72.3)     |
| Surgery plus adjuvant chemotherapy      | 26 (27.7)     |
| Clinical T stage, no. (%)               |               |
| T1                                      | 7 (7.4)       |
| T2                                      | 24 (25.5)     |
| T3                                      | 63 (67.0)     |
| Clinical N stage, no. (%)               |               |
| N0                                      | 53 (56.4)     |
| N1                                      | 26 (27.7)     |
| N2                                      | 12 (12.8)     |
| N3                                      | 3 (3.2)       |
| Clinical stage group, no. (%)           |               |
| I                                       | 4 (4.3)       |
| II                                      | 52 (55.3)     |
| III                                     | 35 (37.2)     |
| IV                                      | 3 (3.2)       |

**Table S3. Basic characteristics of the validation cohort 2, related to Figure 1.**

| Characteristic                          | ESCC (n = 112) |
|-----------------------------------------|----------------|
| Age, years                              |                |
| Median (range)                          | 68 (53-80)     |
| ≥60 years, no. (%)                      | 93 (83.0)      |
| <60 years, no. (%)                      | 19 (17.0)      |
| Sex, no. (%)                            |                |
| Male                                    | 81 (72.3)      |
| Female                                  | 31 (27.7)      |
| Alcohol consumption (habitual), no. (%) |                |
| Never                                   | 98 (87.5)      |
| Previous                                | 14 (12.5)      |
| Smoking status, no. (%)                 |                |
| Never smoker                            | 76 (67.9)      |
| Ex-smoker                               | 36 (32.1)      |
| Hypertension, no. (%)                   |                |
| Yes                                     | 32 (28.6)      |
| No                                      | 80 (71.4)      |
| Diabetes, no. (%)                       |                |
| Yes                                     | 13 (11.6)      |
| No                                      | 99 (88.4)      |
| Histological type, no. (%)              |                |
| Squamous-cell carcinoma                 | 112 (100)      |
| Other                                   | 0              |
| Treatment protocol, no. (%)             |                |
| Surgery alone                           | 73 (65.2)      |
| Neoadjuvant chemotherapy                | 3 (2.7)        |
| Surgery plus adjuvant chemotherapy      | 35 (31.3)      |
| Chemotherapy only                       | 1 (0.8)        |
| Clinical T stage, no. (%)               |                |
| T1                                      | 16 (14.3)      |
| T2                                      | 22 (19.6)      |
| T3                                      | 61 (54.5)      |
| T4                                      | 11 (9.8)       |
| Unknow                                  | 2 (1.8)        |
| Clinical N stage, no. (%)               |                |
| N0                                      | 58 (51.8)      |
| N1                                      | 31 (27.7)      |
| N2                                      | 16 (14.3)      |
| N3                                      | 5 (4.5)        |
| Unknow                                  | 2 (1.8)        |
| Clinical stage group, no. (%)           |                |
| I                                       | 18 (16.1)      |
| II                                      | 33 (29.5)      |

| Characteristic | ESCC (n = 112) |
|----------------|----------------|
| III            | 46 (41.1)      |
| IV             | 13 (11.6)      |
| Unknow         | 2 (1.8)        |

707

708

**Table S4. Basic characteristics of the validation cohort 3, related to Figure S2.**

| Characteristic                          | ESCC (n = 41) |
|-----------------------------------------|---------------|
| Age, years                              |               |
| Median (range)                          | 66 (46-78)    |
| ≥ 60 years, no. (%)                     | 35 (85.4)     |
| < 60 years, no. (%)                     | 6 (14.6)      |
| Sex, no. (%)                            |               |
| Male                                    | 27 (65.9)     |
| Female                                  | 14 (34.1)     |
| Alcohol consumption (habitual), no. (%) |               |
| Never                                   | 37 (90.2)     |
| Previous                                | 4 (9.8)       |
| Smoking status, no. (%)                 |               |
| Never smoker                            | 32 (78.0)     |
| Ex-smoker                               | 9 (22.0)      |
| Hypertension, no. (%)                   |               |
| Yes                                     | 13 (31.7)     |
| No                                      | 28 (68.3)     |
| Diabetes, no. (%)                       |               |
| Yes                                     | 2 (4.9)       |
| No                                      | 39 (95.1)     |
| Histological type, no. (%)              |               |
| Squamous-cell carcinoma                 | 41 (100)      |
| Other                                   | 0             |
| Treatment protocol, no. (%)             |               |
| Surgery alone                           | 38 (92.7)     |
| Surgery plus adjuvant chemotherapy      | 3 (7.3)       |
| Clinical T stage, no. (%)               |               |
| T1                                      | 1 (2.4)       |
| T2                                      | 10 (24.4)     |
| T3                                      | 27 (65.9)     |
| T4                                      | 3 (7.3)       |
| Clinical N stage, no. (%)               |               |
| N0                                      | 16 (39.0)     |
| N1                                      | 13 (31.7)     |
| N2                                      | 10 (24.4)     |
| N3                                      | 2 (4.9)       |
| Clinical stage group, no. (%)           |               |
| I                                       | 3 (7.3)       |
| II                                      | 25 (61.0)     |
| III                                     | 13 (31.7)     |

712 **Table S5. The ingredients of high methionine (0.86%), medium methionine (0.35%), and low**  
 713 **methionine (0.17%) diets for mouse, related to Figure 2.**

714 **Mouse diet with 0.86% methionine**

| <b>Ingredient</b>              | <b>gram</b> | <b>kcal</b> |
|--------------------------------|-------------|-------------|
| Arginine                       | 11.2        | 45          |
| Glutamic Acid                  | 27          | 108         |
| Glycine                        | 23.3        | 93          |
| Histidine-HCl-H <sub>2</sub> O | 3.3         | 13          |
| Isoleucine                     | 8.2         | 33          |
| Leucine                        | 11.1        | 44          |
| Lysine-HCl                     | 18          | 72          |
| Methionine                     | 8.6         | 34          |
| Phenylalanine                  | 11.6        | 46          |
| Threonine                      | 8.2         | 33          |
| Tryptophan                     | 1.8         | 7           |
| Valine                         | 8.2         | 33          |
| Maltodextrin                   | 50          | 200         |
| Cornstarch                     | 432.5       | 1730        |
| Dextrose                       | 200         | 800         |
| Corn Oil                       | 80          | 720         |
| Cellulose                      | 50          | 0           |
| Mineral Mix#200000             | 35          | 0           |
| Vitamin Mix#300050             | 10          | 40          |
| Choline Bitartrate             | 2           | 0           |
| Yellow Dye                     | 0.05        | 0           |

715 **Mouse diet with 0.35% methionine**

| <b>Ingredient</b>              | <b>gram</b> | <b>kcal</b> |
|--------------------------------|-------------|-------------|
| Arginine                       | 11.2        | 45          |
| Glutamic Acid                  | 32.1        | 128         |
| Glycine                        | 23.3        | 93          |
| Histidine-HCl-H <sub>2</sub> O | 3.3         | 13          |
| Isoleucine                     | 8.2         | 33          |
| Leucine                        | 11.1        | 44          |
| Lysine-HCl                     | 18          | 72          |
| Methionine                     | 3.5         | 7           |
| Phenylalanine                  | 11.6        | 46          |
| Threonine                      | 8.2         | 33          |
| Tryptophan                     | 1.8         | 7           |
| Valine                         | 8.2         | 33          |
| Maltodextrin                   | 50          | 200         |

| <b>Ingredient</b>  | <b>gram</b> | <b>kcal</b> |
|--------------------|-------------|-------------|
| Cornstarch         | 432.5       | 1730        |
| Dextrose           | 200         | 800         |
| Corn Oil           | 80          | 720         |
| Cellulose          | 50          | 0           |
| Mineral Mix#200000 | 35          | 0           |
| Vitamin Mix#300050 | 10          | 40          |
| Choline Bitartrate | 2           | 0           |
| Yellow Dye         | 0.05        | 0           |

717

718

**Mouse diet with 0.17% methionine**

| <b>Ingredient</b>              | <b>gram</b> | <b>kcal</b> |
|--------------------------------|-------------|-------------|
| Arginine                       | 11.2        | 45          |
| Glutamic Acid                  | 33.88       | 136         |
| Glycine                        | 23.3        | 93          |
| Histidine-HCl-H <sub>2</sub> O | 3.3         | 13          |
| Isoleucine                     | 8.2         | 33          |
| Leucine                        | 11.1        | 44          |
| Lysine-HCl                     | 18          | 72          |
| Methionine                     | 1.72        | 7           |
| Phenylalanine                  | 11.6        | 46          |
| Threonine                      | 8.2         | 33          |
| Tryptophan                     | 1.8         | 7           |
| Valine                         | 8.2         | 33          |
| Maltodextrin                   | 50          | 200         |
| Cornstarch                     | 432.5       | 1730        |
| Dextrose                       | 200         | 800         |
| Corn Oil                       | 80          | 720         |
| Cellulose                      | 50          | 0           |
| Mineral Mix#200000             | 35          | 0           |
| Vitamin Mix#300050             | 10          | 40          |
| Choline Bitartrate             | 2           | 0           |
| Yellow Dye                     | 0.05        | 0           |

719

720

721

722

723

724
